# Supplementary material for: Slip maxima at fault junctions and rupturing of barriers during the 2008 Wenchuan earthquake
Source: Springer Nature journal article supplement (doi:10.1038/ngeo636), 2009-09-27
Supplement: 41561_2009_BFngeo636_MOESM163_ESM.pdf [file 41561_2009_BFngeo636_MOESM163_ESM.pdf]

### Note 1. Alternative fault model

In a preliminary model we allowed for only a constant-dip BCF fault plane along the southeast segment. The inversion result yielded a fault with a much shallower ( $<20^\circ$ ) dip angle and significant slip on a fault stretching more than 45 km down dip. This model does not seem to be realistic physically, and data fitting was much worse than the current model (rejected by F-test at high confidence level).

We still lack a complete structural model from independent data to provide a more detailed 3D fault rupture geometry. However, we hope that more detailed structural models using data and approaches as described for a single cross-section by Hubbard and Shaw<sup>22</sup> will ultimately allow for a more accurate characterization of the geometry.

### Note 2. Postseismic deformation and its effect on coseismic displacement estimation

The post-earthquake GPS and SAR data used in this study were measured 1-4 and 1-7 weeks after the quake respectively (postseismic InSAR and GPS epochs are listed in Supplementary Tables 1 and 3, respectively), and postseismic deformation occurred prior to the GPS or InSAR measurements are included in our coseismic displacement estimates. Here we use regional continuous GPS measurements to assess possible effects of postseismic displacements on the estimates of coseismic displacements<sup>24</sup>. Fig. S1 shows the coseismic and postseismic displacement vectors, and data time series of three sites located in the vicinity of the fault rupture. Station PIXI is located about 25 km away from the maximum rupture on the BCF, and has continuous data recording through the year of 2008, with only a few hours of data missing right after the earthquake (due to power failure). The detrended position time series of the site for a 9-month time period spanning the quake, shows a large coseismic offset ( $\sim 0.7$  m), but merely 0-6 mm of postseismic displacements within 5 months after the event (lower left panel, Fig. S1). Following the quake more continuous GPS stations were installed in the vicinity of the fault rupture, whose data help further quantify the temporal behavior of the postseismic deformation<sup>24</sup>. The postseismic displacement time series of a GPS site is modeled using a logarithmic function:  $D(t) = D_0 \text{Log}(1+t/T)$ , where  $D_0$  is the amplitude of the postseismic displacement vector, and  $T$  is the logarithmic relaxation time. Using the first six months of data we have estimated a common relaxation time of 8 days (between 4 and 15 days at 95% confidence level) for all the sites<sup>24</sup>. Fig. S1 of lower right panel shows the station position time series of two sites H035 and NR09. The horizontal postseismic displacement amplitudes ( $D_0$ ) for H035 and NR09 are 9.0 mm and 19.1 mm, respectively. The H035 postseismic displacements accumulated 3 and 7 weeks after the quake would therefore be about 12 mm and 18 mm, respectively (0.49% and 0.74% of the coseismic displacement amplitude). The same estimates for NR09 are 25 mm and 38 mm, respectively (3.0% and 4.5% of the coseismic displacement amplitude). These estimates are obtained on condition that a logarithmic relaxation function is adequate to describe the temporal behavior of postseismic deformation. Substantial evidence supports this model, including continuous GPS time series recorded during the entire postseismic period at permanent sites located more distant from the coseismic rupture of the Wenchuan quake than the two sites mentioned above<sup>24</sup>. Fig. S1 also reveals both coseismic and postseismic displacement vectors at more sites, such as H010, H032, SD07, CHDU, MYAN, and RENS, etc.,

whose coseismic/postseismic amplitude ratios are similar to that of H035 and NR09. Based on the preliminary analysis of the postseismic data we conclude that the early postseismic deformation field should be at least an order of magnitude less than the coseismic slip, and therefore does not significantly affect our estimate of fault slip distribution.

### Note 3. Regional tectonics

The Longmen Shan fault system overprinted a Mesozoic orogenic belt during the Late Cenozoic<sup>2,4</sup> as the result of the Indo-Asia collision, when the Tibetan plateau was extruded eastward<sup>S1,S2</sup>, thrusting crustal material of the Songpan-Ganzi block onto a deeply rooted and mechanically strong Sichuan basin. Previous geologic studies have found ample evidence of active reverse and dextral faulting for the central sections of the BCF and PGF, but little such evidence has been found for the northeast sections of the faults north of Beichuan<sup>2,8,9</sup>. Pre-earthquake geodetic studies suggest that deformation in the region between the Longmen Shan and Xianshuihe faults is partitioned. The Longriba fault located ~150 km northwest of and parallel to the Longmen Shan fault (Fig. 1) has ~4-6 mm/yr dextral motion, but such a shearing motion diminishes northeastward toward the eastern end of the East Kunlun fault<sup>12,13,S2</sup>. The sinistral motion on the East Kunlun fault, on the other hand, tapers down to < 2 mm/yr toward its eastern end<sup>S2</sup>, suggesting that most of the relative motion between the eastern Tibetan plateau and Sichuan basin is accommodated along the East Kunlun and Longriba faults. The remaining part has to be absorbed by tectonic structures located between the two domains. Our derived convergence rate across the central Longmen Shan fault ( $1.4 \pm 0.6$  mm/yr) is consistent with Burchfiel et al.'s<sup>2</sup> estimate of  $1 \pm 1$  mm/yr, derived using an earlier version of the GPS dataset than we use here. Our estimates of  $1.4 \pm 0.6$  mm/yr convergence and  $1.7 \pm 0.6$  mm/yr dextral slip across the central Longmen Shan fault system, at the lower bound, also agree with geological estimates of 0.5-0.8 mm/yr convergence and ~1.2 mm/yr dextral slip across both the central BCF and PGF<sup>10</sup>. Considering that other faults such as the WMF located west of the BCF and miscellaneous thrust faults located along the northwestern rim of the Sichuan Basin (e.g. the Longquan and Xiongpao faults<sup>6</sup>) may also make minor contributions to the transpressional motion across the region, the GPS derived regional deformation rates of the past decade are quite consistent with the geological fault slip rates. The lower slip rates of our estimate across the northeastern part of the Longmen Shan ( $0.8 \pm 0.6$  mm/yr dextral and  $0.3 \pm 0.6$  mm/yr shortening) are consistent with geological result showing no significant Holocene faulting activities across the faults in the region<sup>8</sup>. Our result is also supported by seismological and tectonic studies on the Minjiang-Huya fault system showing active reverse faulting<sup>S5,S6</sup>. These results explain the mechanism change of coseismic slip, from predominantly thrust at the southwest end to pure dextral at the northeast end of the rupture.

### Note 4. GPS and InSAR data processing

Most of the GPS stations had years of preseismic occupation history with the latest survey made less than a year prior to the quake, thus secular deformation before the quake could be readily estimated and separated from the coseismic displacements. The postseismic surveys were conducted 1-7 weeks after the quake. Components of immediate postseismic motions in the coseismic displacement estimates are minor, only a few percent for most of the near and intermediate sites, based on our assessment of postseismic deformation recorded by continuous

GPS sites in the region<sup>24</sup> (see the Supplementary Note 2 for details). 158 horizontal and 46 vertical data points are used (see refs. [29] and [12] for details about the data and processing procedure, and Supplementary Table 3 for data). The selected sites are within 300 km distance from the rupture.

The SAR data are processed using the ROI\_PAC software developed at Caltech/JPL (Rosen et al, 2004), with an ALOS extension coded by Sandwell et al.<sup>S7</sup> The 3-arc-second SRTM data<sup>S8</sup> are interpolated to a 1-arc-second grid for topography phase removal. To process the ALOS and Envisat data we first compute the interferograms and remove the topographic signal. We then geocode the wrapped phase into a geographic coordinate system, and apply a multi-look operation (6-look or 2-look for ALOS or ASAR data respectively to produce ~170 m ground pixel size) before phase unwrapping. This procedure boosts the signal-to-noise ratio of InSAR observations, makes the fringes of the interferograms clearer, and makes phase unwrapping more reliable, especially on the hanging wall side. In the next step we use the minimum cost flow algorithm (MCF) unwrapping module in the Gamma software to unwrap each of the interferograms, which minimizes the phase jumping errors and simultaneously maximizes the availability of InSAR phases<sup>S9</sup>. The unwrapped phase is continuous except at places across the fault rupture. After phase unwrapping, we correct for satellite orbit errors and topography correlated atmospheric effects. This is done by estimating a linear orbit ramp and the DEM-related phase<sup>S10</sup> on the DEM-flattened interferograms using the least squares method, which minimizes the range changes in the far field where no significant deformation is expected. We then remove the DEM-related phase from the data. We find that only path 472 of the ALOS data was disturbed significantly by the effect of atmospheric vertical stratification (DEM-related).

We do not remove the orbit ramp from the data at this stage because its estimate based on the assumption of minimal far field deformation may not be reliable. The far field signals for the ALOS L-band data could be seriously contaminated by ionosphere disturbances, which, according to Sandwell et al.<sup>S7</sup>, might be ~16.5 times as large as for the C-band data according to their frequency difference. It is better to do the orbit-ramp correction using GPS data than just assuming flat signals in the far field because the unclear far field signal may be far from zero as we expect. The distributed locations of the GPS observation points throughout the interferograms also makes the calibrations more robust. For each path or track we assume a linear orbit ramp, and minimize in a least squares sense the differences between the GPS derived coseismic displacements in the SAR viewing directions and the corresponding quad-tree resampled InSAR points<sup>S11</sup>.

After removing the orbit ramp the postfit residuals are less than 3 cm for most of the ALOS PALSAR data and less than 2 cm for most of the Envisat ASAR data. The phase data of paths 472~474 are decorrelated across the fault breaks, and their north and south panels are unwrapped separately. The phase jumps across the fault surface breaks for these three interferograms are also estimated and corrected in the GPS calibration. The constant phase shifts of all the paths and the phase jumps across the fault breaks of paths 472-474 are estimated further in the joint GPS and InSAR dislocation inversion later on. As expected, all of these constant shifts are smaller than 3 cm except for the one of the south part of path 472, which is up to 13.6 cm. This is likely because only one GPS data point was available for making the orbit ramp correction of this data panel, and the result might be subject to large errors. We also

identify regions showing strong long-wavelength, non-earthquake deformation signals, such as the southern parts of paths 471 and 472 and the northern part of path 473. Such problematic data are excluded from the model inversion (Fig. S2).

We apply a quad-tree decomposition algorithm to decimate the InSAR data<sup>S11</sup>. We first expand the InSAR LOS images by padding zeros to empty areas, making the image dimensions to be a power of 2. We then split the expanded image up to four equal quadrants and compute the variance of each quadrant. If the variance of a quadrant is larger than a presumed threshold, the quadrant will be split up to four smaller quadrants. If the variance of a quadrant is lower than the threshold, we compute the mean LOS phase value of the quadrant as its representative deformation measurement. The sub-sampling procedure is done iteratively until convergence. The threshold is set according to the noise level of the InSAR data. It is above the correlation noise level, but low enough so that the deformation gradients are kept as complete as possible. Considering the long strip of ALOS data, we choose three different thresholds for different regions of the data: 2 cm, 2-3 cm, and >3 cm for the near, intermediate, and far fields, respectively. For the ASAR data, the threshold is set to be 1 cm, consistent with its very low noise level.

In the sub-sampling process, we also compute the LOS unit vector of every InSAR point so that the influence of varying view angles can be minimized, especially in the common parts of neighboring tracks/paths.

#### Note 5. Reweighting of GPS and InSAR data

We have reweighted the GPS and InSAR data as follow. We down-weight the GPS data by adding a factor of  $D^{1/4}$  to their original uncertainties, where  $D$  is the displacement amplitude in millimeter. Such a treatment is based on the consideration that the near-field GPS data are sensitive to abrupt spatial variations of fault slip and may not be compatible with the smoothing constraint imposed on the fault slip model.

We adopt a conservative strategy dealing with data errors, not accounting for correlation of the InSAR and GPS data in our inversion. This simple approach is widely used in InSAR studies. There have also been studies considering the correlated errors in modeling<sup>S12,S13</sup>, but the approaches have not been independently verified, especially using independent observations. Our group developed a 2D full covariance error model to describe the atmospheric delay of radar signals, applied that to the 2008 Nima, Tibet earthquake, and found that it did not have much an impact to our solution<sup>S14</sup>. Furthermore, the current studies on InSAR error correlation have been with C-Band data only, which do not have the kind of long-wavelength disturbance like the ALOS data do. And, the construction of variance/covariance matrix requires that the far field InSAR data be of second order stationary with a zero mean, a condition which could not be met here because of the long-wavelength disturbance in the ALOS data. We therefore choose to use a diagonal error matrix for both the InSAR and GPS data. The uncertainties of the ALOS and ASAR data are set to be 50 mm and 20 mm respectively. Both uncertainties are assigned higher than their nominal uncertainties by a factor of about two, to compensate for neglecting the spatial correlations of the InSAR data errors in data error propagation.

It is still subject to discussion how much weighting relative to GPS data the InSAR data should be assigned. We attempt a range of the InSAR down-weighting factors from 1.5 to 3.0 in test runs. The results do show some changes in solution, such as slight reduction of the

largest slip when the GPS data are weighted relatively less; but the first order features, such as the locations and sizes of the peaks and lows, remain unchanged.

#### Note 6. Identification of fault surface breaks and geometry

We use the amplitude offset data of SAR pairs to locate fault surface breaks, the approach is similar to the one used by Peltzer et al.<sup>S10</sup> The offset-tracking technique of the Gamma software with 64 x 64 windows and 8 x 16 steps on the Single Look Complex data is applied to retrieve the range and azimuth offset fields (Figs. S3 a & b). The results of the offset-tracking processing provide strong constraints on the fault locations of the Wenchuan earthquake. Both the azimuth and range offset data sets are used for fault identification. The former is important for the PGF trace identification, and the latter is good for the BCF rupture identification (Fig. S3). Because the datasets themselves still have multiple wavelength features after removing orbital tilts from the offset field, especially in the azimuth offset data, we do not use these data for modeling. We suspect that the multiple wavelength features were caused by ionosphere disturbance, but further investigation is needed to test this hypothesis.

Concentration of aftershock locations helps identify the surface projections of the faults at the northeast and southwest ends, where the rupture may not have broken to the surface. The surface traces are further smoothed to shape the top boundaries of our fault rupture model. The fault dip angle is assumed constant down-dip, but varies linearly along strike for the entire fault except at Nanba (~104.8°E, 32.2°N). Aftershock locations suggest a right-stepping offset at depth across this location, with a northwest dipping fault plane to the southwest of the fault step and a near vertical geometry to the northeast<sup>21</sup>. We therefore allow a dip angle change across this step-over, separating the fault plane of the BCF into two segments. A uniform dip angle is assumed for the PGF section of the fault plane and treated as unknown in the inversion. Six dip angles at fault nodal points are inverted for in the solution, the other dip angles are either interpolated or tied to the neighbor (for the southwestern end point, Fig. 3a).

#### Note 7. Meshing and smoothing of fault model

All the fault sections are meshed with small rectangular tiles of ~4×4 km in size. The BCF section of the fault plane is assumed to have 7 rows of patches with 28 km in total width (Fig. 3). A flat fault segment is assumed to branch out from the downdip end of the southwest segment of the BCF (Fig. 3a), and is composed of 7×13 patches. Inclusion of the segment is required by the data (see Note 1). The PGF section of the fault plane is assumed to have 5 rows of patches, and spans 20 km in total down-dip width. Smoothing constraints are imposed for all the neighboring patches, on both the along-strike and down-dip components, with a finite uncertainty of 100 mm assumed for the smoothing conditions. The only exception is at Nanba between the first and second fault segments of the BCF counting from the northeast, where no smoothing is imposed on the neighboring slip components and an abrupt change of the fault dip angle is allowed (Fig. 3). The uncertainty value is chosen by balancing a trade-off curve between the postfit residual  $\chi^2$  and the number of parameters resolved in the solution (see ref. [S16] for details of the procedure).

#### Note 8. Uncertainties in earthquake recurrence interval estimations

The earthquake recurrence intervals across fault segments are derived from estimates of

mean fault slip of a characteristic event and interseismic fault slip (or deficit) rates. These estimates are subject to multiple sources of errors, which need to be accounted for to better understand the reliability of these estimates. For derivations of the mean coseismic fault slip across fault segments, we take a mean slip of the top five rows, equivalent to 20 km of fault width. If the downdip width of 20 km does not match the bottom of the seismogenic layer, the mean coseismic slip estimate can be off. We run a test calculating the mean fault slip rates of the top four, five, and six rows of the fault patches (equivalent to 16 km, 20 km, and 24 km of fault width). Our result shows that among the 14 fault segments calculated, 11 have variations of their fault slip estimates of less than 10%, and 3 have variations greater than 10% but less than 20%, respectively. Errors on the fault dip angle estimates have no direct effect on our mean slip estimate, since we assume a listric fault whose balance between the interseismic moment accumulation (proportional to interseismic slip rate) and coseismic moment release (proportional to mean fault slip) does not depend on the dip angle. Variation of degree of smoothing of fault slip would change the mean fault slip estimate a bit, but only by a few percent when the a priori smoothing uncertainty changes between 70 mm and 200 mm.

Estimations on the interseismic fault slip rates, however, suffer from greater uncertainties. The secular shortening rate is  $1.4 \pm 0.6$  mm/yr for the southwest segment and the secular dextral slip rate is  $0.8 \pm 0.6$  mm/yr for the northeast segment of the Longmen Shan fault, respectively, making the errors corresponded to  $\sim 43\%$  and  $\sim 75\%$  of the signals. The geological estimate of the fault slip rate on the BCF is 0.3-0.6 mm/yr; that is, the error corresponds to  $\sim 33\%$  of the signal. Another relatively large error source is the uncertainty of the characteristic events for the fault segments: whether they are independent or joint ruptures on the BCF and PGF. Weighing all these factors, we take only two error sources into consideration in our estimates of earthquake recurrence intervals: uncertainties of the fault slip rates and the characteristic rupture events, since all the other errors are of higher order and would not have much impacts on our final estimates of the recurrence intervals.

#### Method 1. Fault slip model and Newtonian nonlinear inversion

The slips on individual fault patches are linked to the GPS and InSAR measurements on the Earth's surface using the Okada dislocation code<sup>S17</sup> that allows for the calculation of displacements in a uniform elastic half-space, and the partial derivatives for the nonlinear parameters of six dip angles are derived numerically. We start the model assuming a uniform dip of  $50^\circ$  to the northwest for all the BCF and PGF segments; after about 30 iteration steps the solution converges.

We have 362 GPS and 9110 InSAR data entries in the inversion. The total number of linear model parameters is 1364, which includes 12 InSAR offset terms (1 or 2 terms for each scene depending on whether range-change continuity is preserved across the fault) in addition to the slip components on 676 fault patches. There are another six nonlinear parameters for the dip angles, which are inverted for together with the linear parameters.

We use a Newtonian nonlinear inversion procedure to solve for the coseismic slip distribution, constrained using the GPS and InSAR data. The procedure is as follows.

Let the problem be:

$$\mathbf{y} = \mathbf{Ax} + \mathbf{e},$$

where  $\mathbf{y}$  is an  $n \times 1$  array composed of the GPS and InSAR data,  $n$  is the total number of data points. The GPS data are the east, north, and up components of coseismic displacements, and the InSAR data are the coseismic line of sight changes.  $\mathbf{x}$  is an array of  $m_l \times 1$ , composed of two parts; the first part involves the along strike and up-dip components of coseismic slip on fault patches, and the second part has the constants of SAR satellite orbit ramp and the across-fault jumps for paths 472, 473, and 474.  $\mathbf{A}$  is an  $n \times m_l$  array, linking the unknowns of fault slip and the interferogram constants linearly to the observations.  $\mathbf{A} = \mathbf{A}(\mathbf{z})$ ,  $\mathbf{z} = (z_1, z_2, \Lambda, z_{m_n})$  are the nonlinear parameters of fault dip angles.  $m_n = 6$  for our model.  $\mathbf{e}$  is an  $n \times 1$  array for data errors.  $\mathbf{e} = N(0, C_d)$ ,  $C_d$  is the variance/covariance matrix of the errors.

We impose a first-order smoothing constraint to the fault slip components, in the form of

$$\mathbf{0} = \mathbf{G}\mathbf{x} + \mathbf{h},$$

where  $\mathbf{G}$  is a  $p \times m_l$  array for imposing  $p$  constraints to the solution. For each pair of adjacent fault tiles (in both along strike and up-dip directions), the entries are 1 and -1 for the corresponding pair of slip components, and 0 for the rest of the components.  $\mathbf{h}$  is a  $p \times 1$  array of a priori errors.  $\mathbf{h} = N(0, C_a)$ ,  $C_a$  is the variance/covariance matrix of the a priori errors, composed of non-zero diagonal terms only.

The joint equations for data and a priori constraints are:

$$\begin{bmatrix} \mathbf{y} \\ \mathbf{0} \end{bmatrix} = \begin{bmatrix} \mathbf{A} \\ \mathbf{G} \end{bmatrix} \mathbf{x} + \begin{bmatrix} \mathbf{e} \\ \mathbf{h} \end{bmatrix}$$

In the first step we assume a set of nonlinear parameters  $\mathbf{z}_0$ , then  $\mathbf{y} = \mathbf{A}(\mathbf{z}_0)\mathbf{x} + \mathbf{e}$ , a least

squares solution yields:  $\mathbf{x}_0 = (\mathbf{A}^T \mathbf{C}_d^{-1} \mathbf{A} + \mathbf{G}^T \mathbf{C}_a^{-1} \mathbf{G})^{-1} \mathbf{A}^T \mathbf{C}_d^{-1} \mathbf{y}$

The first round postfit residuals are:

$$\begin{bmatrix} \mathbf{dy}_1 \\ \mathbf{db}_1 \end{bmatrix} = \begin{bmatrix} \mathbf{y} \\ \mathbf{0} \end{bmatrix} - \begin{bmatrix} \mathbf{A}(\mathbf{z}_0) \\ \mathbf{G} \end{bmatrix} \mathbf{x}_0$$

Taking the first order perturbation of the observables:

$$\mathbf{dy} = \mathbf{A} \mathbf{dx} + \frac{\mathbf{dA}}{\mathbf{dz}} \mathbf{x} \mathbf{dz} + \mathbf{e}$$

Or:  $\mathbf{dy} = \begin{bmatrix} \mathbf{A} & \mathbf{B} \end{bmatrix} \begin{bmatrix} \mathbf{dx} \\ \mathbf{dz} \end{bmatrix}$ , where  $\mathbf{B} = \frac{\mathbf{dA}}{\mathbf{dz}} \mathbf{x}$ , which are the numerically derived partial

derivatives with respect to the fault dip angles.

Let the postfit residuals link with parameter increments:

$$\begin{bmatrix} \mathbf{dy}_1 \\ \mathbf{db}_1 \end{bmatrix} = \begin{bmatrix} \mathbf{A}(\mathbf{z}_0) & \mathbf{B}(\mathbf{z}_0, \mathbf{x}_0) \\ \mathbf{G} & \mathbf{0} \end{bmatrix} \begin{bmatrix} \mathbf{dx} \\ \mathbf{dz} \end{bmatrix} + \begin{bmatrix} \mathbf{e} \\ \mathbf{h} \end{bmatrix}$$

Solve above equations by least squares to obtain  $\mathbf{dx}_1$  and  $\mathbf{dz}_1$ :

$$\begin{bmatrix} \mathbf{dx}_1 \\ \mathbf{dz}_1 \end{bmatrix} = \left[ \begin{bmatrix} \mathbf{A} & \mathbf{B} \end{bmatrix}^T \mathbf{C}_d^{-1} \begin{bmatrix} \mathbf{A} & \mathbf{B} \end{bmatrix} + \mathbf{G}^T \mathbf{C}_a^{-1} \mathbf{G} \right]^{-1} \begin{bmatrix} \mathbf{A} & \mathbf{B} \end{bmatrix}^T \mathbf{C}_d^{-1} \begin{bmatrix} \mathbf{dy}_1 \\ \mathbf{db}_1 \end{bmatrix}$$

Let  $\mathbf{z}_1 = \mathbf{z}_0 + \mathbf{dz}_1$ ,  $\mathbf{x}_1 = \mathbf{x}_0 + \mathbf{dx}_1$ , the second round postfit residuals are:

$$\begin{bmatrix} \mathbf{dy}_2 \\ \mathbf{db}_2 \end{bmatrix} = \begin{bmatrix} \mathbf{y} \\ \mathbf{0} \end{bmatrix} - \begin{bmatrix} \mathbf{A}(\mathbf{z}_1) \\ \mathbf{G} \end{bmatrix} \mathbf{x}_1$$

Then we solve

$$\begin{bmatrix} \mathbf{dy}_2 \\ \mathbf{db}_2 \end{bmatrix} = \begin{bmatrix} \mathbf{A}(\mathbf{z}_1) & \mathbf{B}(\mathbf{z}_1) \\ \mathbf{G} & \mathbf{0} \end{bmatrix} \begin{bmatrix} \mathbf{dx}_2 \\ \mathbf{dz}_2 \end{bmatrix} + \begin{bmatrix} \mathbf{e} \\ \mathbf{h} \end{bmatrix}$$

by least squares to obtain  $\mathbf{dx}_2$  and  $\mathbf{dz}_2$ .

Continue the iteration until the weighted postfit  $\chi^2$  reduction becomes trivial. The postfit  $\chi^2$  is defined as:

$$\chi^2 = \mathbf{dy}^T \mathbf{C}_d^{-1} \mathbf{dy} + \mathbf{db}^T \mathbf{C}_d^{-1} \mathbf{db}$$

The resolution matrix is<sup>S18</sup>:

$$\mathbf{R} = (\mathbf{A}^T \mathbf{C}_d^{-1} \mathbf{A} + \mathbf{G}^T \mathbf{C}_a^{-1} \mathbf{G})^{-1} \mathbf{A}^T \mathbf{C}_d^{-1} \mathbf{A}$$

The sum of the diagonal terms of R is the total number of resolution (i.e. the rank of the resolution matrix) resolved by the data. The reduced postfit  $\chi_d^2$  due to data is defined as

$$\chi_d^2 = \frac{\mathbf{dy}^T \mathbf{C}_d^{-1} \mathbf{dy}}{n - m_l - m_n}$$

The inverted fault slip model is listed in Supplementary Table 2, and the GPS data fitting result is in Supplementary Table 3. Among all the slip parameters only 53.5 degrees of freedom are resolved by data, the rest are constrained by the a priori smoothing constraints (see ref. [S18] for resolution interpretation of the inversion). It means that slip on individual fault patches may not be well resolved and reliable; however, slip patterns over a panel of several patches have much better resolution and reliability.

The model is able to achieve 94% reduction of the GPS and InSAR data variance after model fitting, and the reduced posteriori residual  $\chi^2$  is 3.70. Such a result suggests that although there may be some parts of the data not well explained, the overall fit is quite reasonable.

As shown in Fig. 2, our optimal model successfully explains most of the deformation signals. Nevertheless there are still some notable patterns left in the residual interferograms. We may have explanations for some of them. For example, the negative range change of up to 30 cm in the region northeast of the PGF surface rupture suggests that a longer PGF rupture is needed to model the deformation field. The phase discontinuity on the interferograms across this section of the fault is not clear (Fig. S2). Discontinuous traces of fault fissures were witnessed along this section of the PGF, but measured offsets were small ( $\sim 10$  cm)<sup>3</sup>. The lack of observations, however, does not preclude the possibility that the PGF may have broken



underneath the surface, causing deformation in the region. The negative range change south of Beichuan may have been the result of a similar cause, as the interferogram in the region shows a moderate phase gradient equivalent to a few centimeters of range change. Some large residuals in the intermediate and far field range from the fault were probably produced by atmospheric disturbances and cannot be modeled in this study, such as the ones located at the southern parts of the images of tracks 471, 472, and 476, and at the northern part of the image of track 473 (Figs. 2 and S2).

## References

1. Molnar, P., and Tapponnier, P. Cenozoic tectonics of Asia: effects of a continental collision. *Science*, **189**, 419-426 (1975).
2. England, P. C., and Houseman, G. A. Finite strain calculations of continental deformation, 2, Comparison with the India-Asia collision zone. *J. Geophys. Res.*, **91**, 3664-3676 (1986).
3. Xu, X., Wen, X., Chen, G., and Yu, G. Discovery of the Longriba fault zone in eastern Bayan Har block, China and its tectonic implication. *Sci. China Ser. D-Earth Sci.*, **51**(9), 1209-1223 (2008).
4. Kirby, E., et al. Slip rate gradients along the eastern Kunlun fault. *Tectonics*, **26**, TC2010, doi:10.1029/2006TC002033 (2007).
5. Jones, L.M., et al. Focal mechanisms of the Songpan earthquakes of August 1976 in Sichuan, China. *J. Geophys. Res.*, **89**, 7697-7707 (1984).
6. Kirby, E., et al. Neotectonics of the Min Shan, China: Implications for mechanisms driving Quaternary deformation along the eastern margin of the Tibetan Plateau. *Geol. Soc. Amer. Bull.*, **112**, 375-393 (2000).
7. Sandwell, D., et al. Accuracy and resolution of ALOS interferometry: Vector deformation maps of the Father's Day intrusion at Kilauea. *IEEE Transactions on Geoscience and Remote Sensing* (2007).
8. Farr T. G., et al. The shuttle radar topography mission. *Rev. Geophys.*, **45**, RG2004, doi:10.1029/2005RG000183 (2007).
9. Wegmuller, U., and Werner, C. Retrieval of vegetation parameters with SAR Interferometry. *IEEE Transactions on Geoscience and Remote Sensing*, **35**(1), 18-24 (1997).
10. Hanssen, R. F. *Radar interferometry: Data interpretation and error analysis*, Kluwer Academic Publishers, Dordrecht (2001).
11. Jónsson, S., et al. Fault slip distribution of the 1999 M-w 7.1 Hector Mine, California, earthquake, estimated from satellite radar and GPS measurements. *Bull. Seismol. Soc. Am.*, **92**(4), 1377-1389 (2002).
12. Sudhaus, H., and S. Jónsson. Improved source modelling through combined use of InSAR and GPS under consideration of correlated data errors: application to the June 2000 Kleifarvatn earthquake, Iceland. *Geophysical Journal International*, **176**(2), 353-655 (2009).
13. Funning, G. J., et al. Surface displacements and source parameters of the 2003 Bam (Iran) earthquake from Envisat advanced synthetic aperture radar imagery. *J. Geophys. Res.*, **110**, B09406, doi:10.1029/2004JB003338 (2005).
14. Sun, J., et al. Synthetic Normal faulting of the 9 January 2008 Nima (Tibet) Earthquake

- from Conventional and Along-track SAR Interferometry. *Geophys. Res. Lett.*, **35**, L22308, doi:10.1029/2008GL035691 (2008).
15. Peltzer, G., et al. Evidence of nonlinear elasticity of the crust from the Mw7.6 Manyi (Tibet) earthquake. *Science*, **286**(5438), 272-276 (1999).
  16. Shen, Z.-K., et al. Northridge earthquake rupture models based on the global positioning system measurements. *Bull. Seismol. Soc. Am.*, **86**, 1B, S37-S48 (1996).
  17. Okada, Y. Internal deformation due to shear and tensile faults in a half-space. *Bull. Seism. Soc. Am.*, **82**, 1018-1040 (1992).
  18. Jackson, D. D., and M. A. Matsu'ura. A Bayesian approach to nonlinear inversion. *J. Geophys. Res.*, **90**, 581-591 (1985).

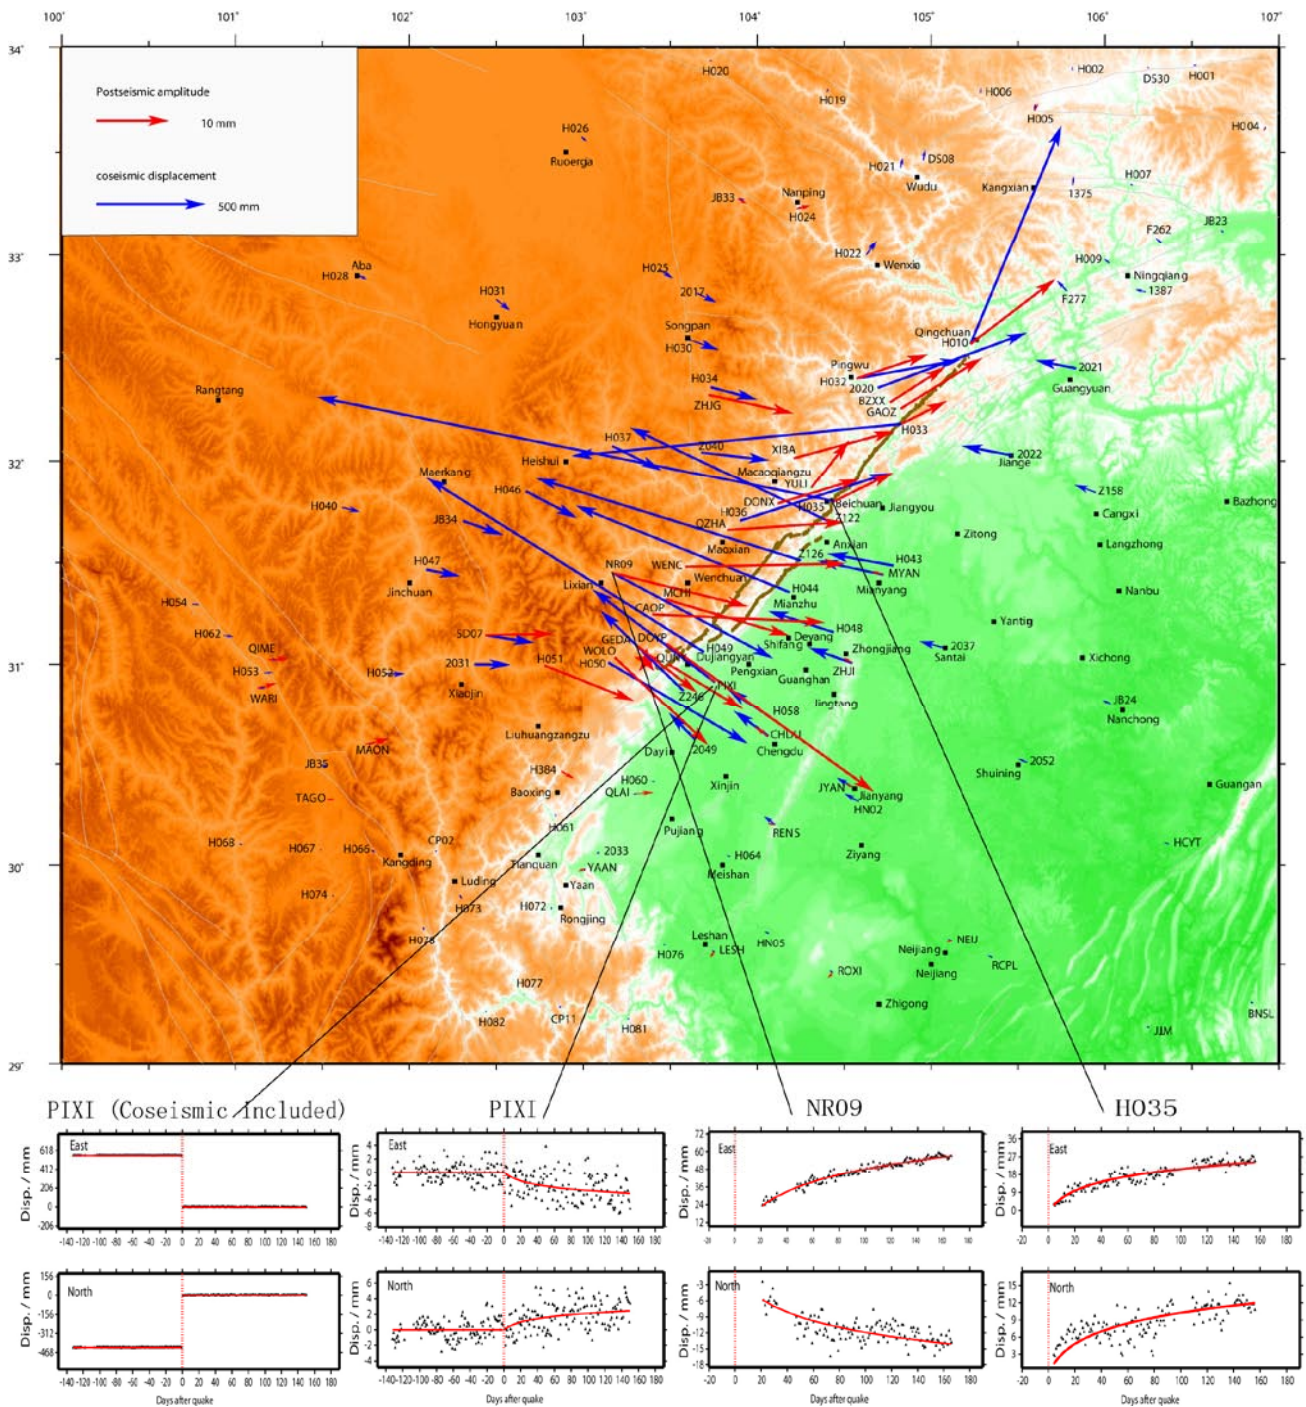

Figure S1. Upper panel: station coseismic (blue arrows) and postseismic (red arrows) displacement vectors (Note the different scale of arrows shown in inset legend). The postseismic displacements are presented as amplitudes of logarithmic functions, equivalent to accumulated displacements at the 14th day after the quake. Lower right panel: horizontal components of postseismic displacement time series for stations H035 and NR09; black triangles are the data, red curves are those predicted by a logarithmic relaxation model with a time constant of 8 days. Red vertical dashed lines mark the epoch of earthquake occurrence. Lower left panel: horizontal components of pre- and post-seismic displacement time series for station PIXI, with and without coseismic displacement jumps.

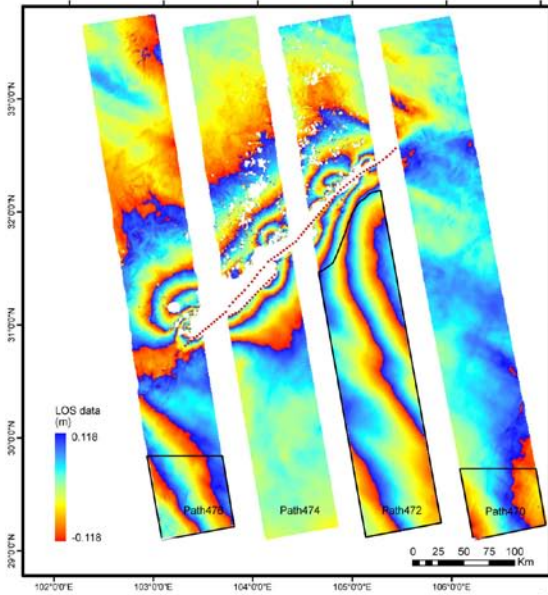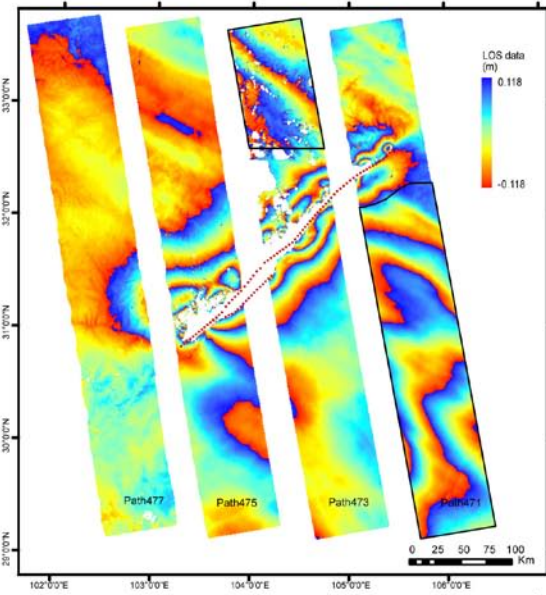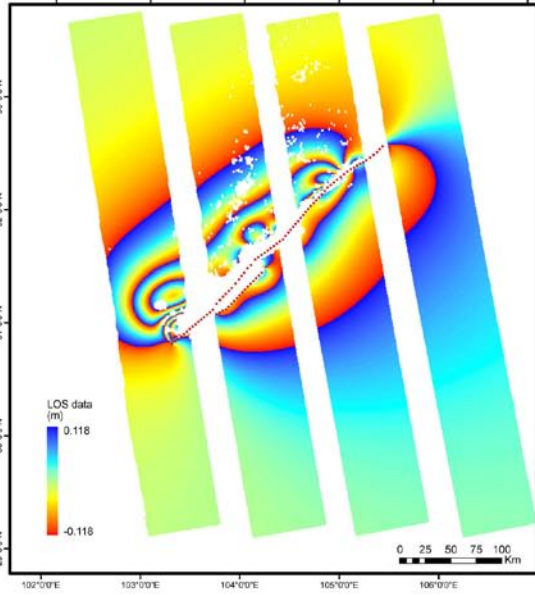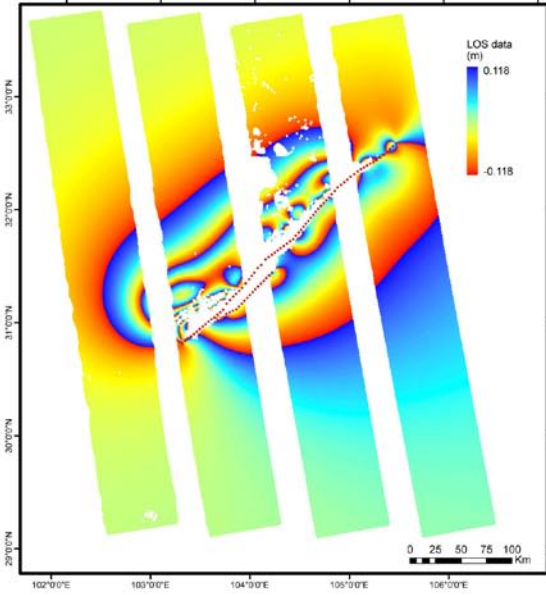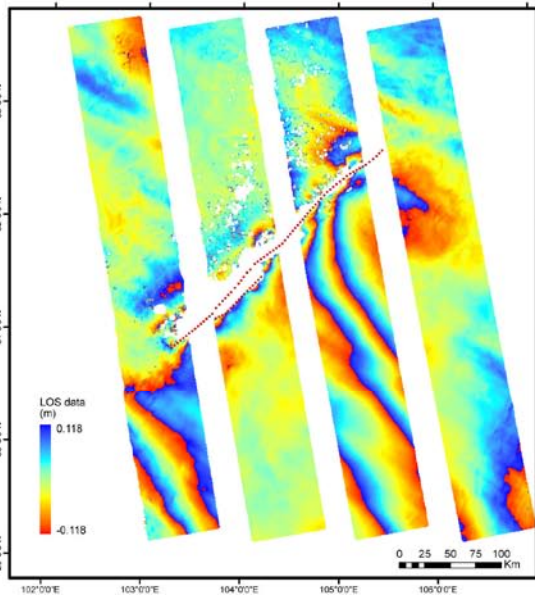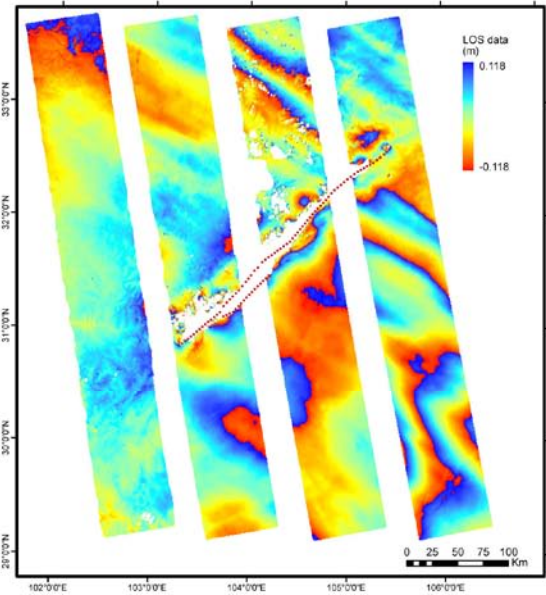

Figure S2. ALOS InSAR data fitting. The figures are the same as in Fig. 2 except that the interferograms are not shadowed by their neighbors. Top panel: observations (portions of data not used in modeling are delineated with black frames). Left and right panels show even and odd numbered ALOS path interferograms, respectively. Central panel: model predicted, and bottom panel: postfit residuals. Red dots are the surface nodal points of fault model patches.

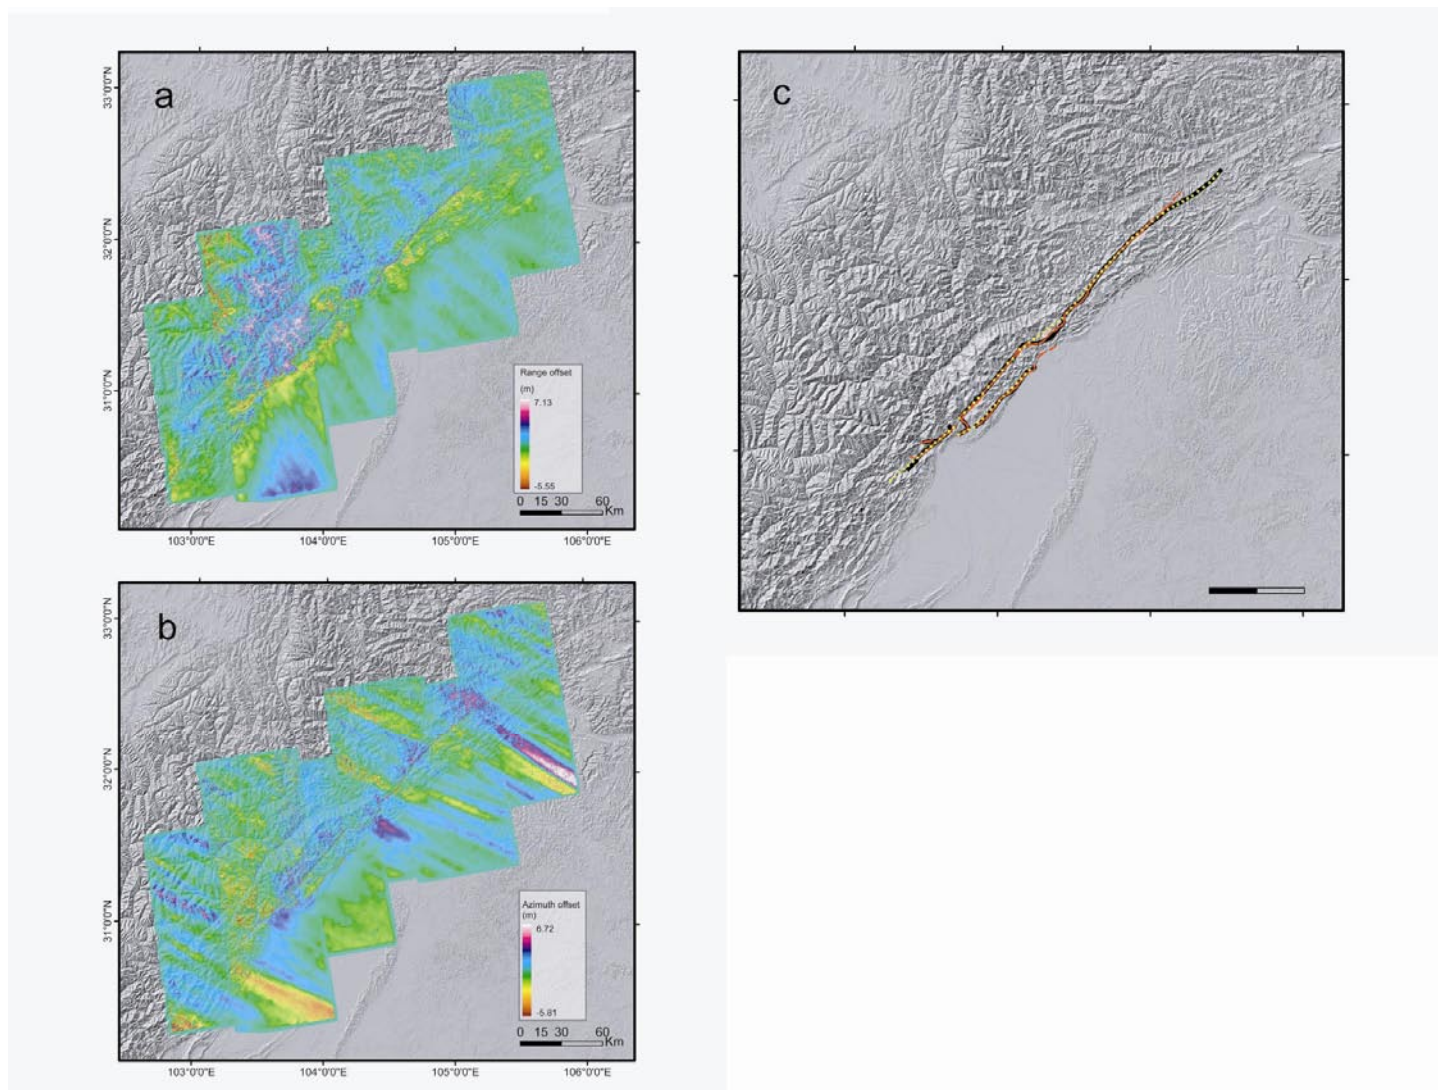

Figure S3. Identification of fault surface breaks. a) ALOS range offsets and traces of identified fault breaks. b) ALOS azimuth offsets and traces of identified fault breaks. c) Comparison of fault surface breaks. Red lines: inferred from the SAR data, black lines: mapped by field geologists<sup>3</sup>, and yellow dots: surface nodal points of fault patches used in this study. Our result differs from that of Xu et al.<sup>3</sup> at the northeast end of the rupture. Theirs was based on aftershock locations and may not be as accurate as our reading of the SAR interferograms.

**Table 1.** SAR data used for derivation of coseismic displacements of the Wenchuan earthquake.

| Path/Track | Frame     | $\theta^a$ | Pre-seismic epoch | Post-seismic epoch | $B_{\perp}^b (m)$ | Orbit direction <sup>c</sup> |
|------------|-----------|------------|-------------------|--------------------|-------------------|------------------------------|
| ALOS 470   | 580-650   | 38.7°      | 09 Feb 2007       | 29 Jun 2008        | -90               | A                            |
| ALOS 471   | 580-650   | 38.7°      | 29 Feb 2008       | 31 May 2008        | 90                | A                            |
| ALOS 472   | 580-650   | 38.7°      | 28 Jan 2007       | 17 Jun 2008        | 203               | A                            |
| ALOS 473   | 580-650   | 38.7°      | 17 Feb 2008       | 19 May 2008        | 225               | A                            |
| ALOS 474   | 580-650   | 38.7°      | 05 Mar 2008       | 05 Jun 2008        | 283               | A                            |
| ALOS 475   | 580-650   | 38.7°      | 20 Jun 2007       | 22 Jun 2008        | -34               | A                            |
| ALOS 476   | 580-650   | 38.7°      | 08 Apr 2008       | 24 May 2008        | -300              | A                            |
| ALOS 477   | 580-650   | 38.7°      | 25 Apr 2008       | 10 Jun 2008        | -70               | A                            |
| ASAR 290   | 2961-3015 | 22.8°      | 03 Mar 2008       | 16 Jun 2008        | -474              | D                            |

<sup>a</sup> Incidence angle in the swath center

<sup>b</sup> Perpendicular baseline between pre- and post-seismic satellite orbits

<sup>c</sup> A for ascending pass, D for descending pass.

Table 2 Fault slip model.

| Index | Length/km | Wid/km | Depth/km | Dip/° | Strike/° | Lat/°N  | Long/°E  | SS/mm    | TS/mm*  |
|-------|-----------|--------|----------|-------|----------|---------|----------|----------|---------|
| 1     | 3.8142    | 4      | 3.9730   | 96.66 | -137.01  | 32.6194 | 105.4699 | -1437.08 | 1250.42 |
| 2     | 3.8151    | 4      | 7.9605   | 96.66 | -135.90  | 32.6168 | 105.4732 | -1447.38 | 1181.39 |
| 3     | 3.8189    | 4      | 11.9407  | 96.66 | -134.78  | 32.6140 | 105.4764 | -1463.85 | 996.27  |
| 4     | 3.8259    | 4      | 15.9210  | 96.66 | -133.67  | 32.6112 | 105.4795 | -1456.66 | 814.82  |
| 5     | 3.8359    | 4      | 19.9012  | 96.66 | -132.56  | 32.6084 | 105.4826 | -1434.74 | 681.21  |
| 6     | 3.8489    | 4      | 23.8815  | 96.66 | -131.45  | 32.6055 | 105.4855 | -1411.91 | 601.32  |
| 7     | 3.8648    | 4      | 27.8617  | 96.66 | -130.34  | 32.6025 | 105.4884 | -1397.95 | 566.45  |
| 8     | 3.8162    | 4      | 3.9875   | 94.53 | -137.00  | 32.5953 | 105.4410 | -1521.34 | 1303.18 |
| 9     | 3.8192    | 4      | 7.9713   | 94.53 | -134.78  | 32.5932 | 105.4434 | -1528.88 | 1210.42 |
| 10    | 3.8267    | 4      | 11.9570  | 94.53 | -132.55  | 32.5912 | 105.4457 | -1517.20 | 979.33  |
| 11    | 3.8388    | 4      | 15.9427  | 94.53 | -130.34  | 32.5890 | 105.4479 | -1482.56 | 780.39  |
| 12    | 3.8552    | 4      | 19.9283  | 94.53 | -128.14  | 32.5868 | 105.4500 | -1442.10 | 649.19  |
| 13    | 3.8761    | 4      | 23.9140  | 94.53 | -125.96  | 32.5846 | 105.4521 | -1410.28 | 580.40  |
| 14    | 3.9014    | 4      | 27.8997  | 94.53 | -123.79  | 32.5823 | 105.4541 | -1396.00 | 559.92  |
| 15    | 3.8152    | 4      | 3.9965   | 92.40 | -136.99  | 32.5711 | 105.4121 | -1621.03 | 1184.26 |
| 16    | 3.8197    | 4      | 7.9893   | 92.40 | -134.76  | 32.5700 | 105.4133 | -1615.12 | 1102.68 |
| 17    | 3.8241    | 4      | 11.9840  | 92.40 | -132.53  | 32.5689 | 105.4145 | -1568.47 | 911.65  |
| 18    | 3.8285    | 4      | 15.9786  | 92.40 | -130.30  | 32.5677 | 105.4157 | -1507.56 | 741.38  |
| 19    | 3.8329    | 4      | 19.9733  | 92.40 | -128.08  | 32.5666 | 105.4168 | -1453.27 | 630.61  |
| 20    | 3.8372    | 4      | 23.9679  | 92.40 | -125.85  | 32.5653 | 105.4178 | -1417.12 | 577.04  |
| 21    | 3.8416    | 4      | 27.9626  | 92.40 | -123.63  | 32.5641 | 105.4188 | -1403.83 | 568.35  |
| 22    | 4.5089    | 4      | 4.0000   | 90.27 | -127.80  | 32.5470 | 105.3780 | -1623.76 | 1106.49 |
| 23    | 4.5247    | 4      | 7.9962   | 90.27 | -125.93  | 32.5469 | 105.3782 | -1619.42 | 1013.58 |
| 24    | 4.5399    | 4      | 11.9943  | 90.27 | -124.06  | 32.5468 | 105.3783 | -1571.81 | 866.95  |
| 25    | 4.5546    | 4      | 15.9924  | 90.27 | -122.20  | 32.5467 | 105.3785 | -1508.60 | 735.04  |
| 26    | 4.5688    | 4      | 19.9906  | 90.27 | -120.34  | 32.5466 | 105.3786 | -1456.98 | 646.65  |
| 27    | 4.5823    | 4      | 23.9887  | 90.27 | -118.49  | 32.5465 | 105.3788 | -1427.33 | 604.08  |
| 28    | 4.5953    | 4      | 27.9868  | 90.27 | -116.64  | 32.5463 | 105.3789 | -1421.87 | 600.68  |
| 29    | 4.5089    | 4      | 3.9979   | 88.13 | -127.80  | 32.5232 | 105.3390 | -1650.09 | 1137.31 |
| 30    | 4.5113    | 4      | 7.9921   | 88.13 | -125.91  | 32.5242 | 105.3382 | -1608.17 | 1036.03 |
| 31    | 4.5137    | 4      | 11.9881  | 88.13 | -124.02  | 32.5251 | 105.3374 | -1546.98 | 915.86  |
| 32    | 4.5162    | 4      | 15.9841  | 88.13 | -122.13  | 32.5261 | 105.3367 | -1495.57 | 803.17  |
| 33    | 4.5186    | 4      | 19.9802  | 88.13 | -120.25  | 32.5271 | 105.3360 | -1463.08 | 718.03  |
| 34    | 4.5211    | 4      | 23.9762  | 88.13 | -118.36  | 32.5282 | 105.3353 | -1450.72 | 669.68  |
| 35    | 4.5235    | 4      | 27.9722  | 88.13 | -116.48  | 32.5292 | 105.3347 | -1458.15 | 659.41  |
| 36    | 4.5104    | 4      | 3.9903   | 86.00 | -127.78  | 32.4994 | 105.3001 | -1772.98 | 1223.97 |
| 37    | 4.4811    | 4      | 7.9769   | 86.00 | -125.91  | 32.5015 | 105.2984 | -1629.38 | 1200.68 |
| 38    | 4.4498    | 4      | 11.9653  | 86.00 | -124.04  | 32.5037 | 105.2969 | -1538.82 | 1120.29 |
| 39    | 4.4163    | 4      | 15.9537  | 86.00 | -122.15  | 32.5059 | 105.2955 | -1504.59 | 989.19  |
| 40    | 4.3806    | 4      | 19.9421  | 86.00 | -120.25  | 32.5081 | 105.2942 | -1496.37 | 866.62  |
| 41    | 4.3427    | 4      | 23.9306  | 86.00 | -118.35  | 32.5104 | 105.2930 | -1502.36 | 782.02  |

|    |        |   |         |       |         |         |          |          |         |
|----|--------|---|---------|-------|---------|---------|----------|----------|---------|
| 42 | 4.3026 | 4 | 27.9190 | 86.00 | -116.43 | 32.5127 | 105.2919 | -1521.06 | 743.72  |
| 43 | 3.5213 | 4 | 3.9771  | 83.87 | -119.29 | 32.4806 | 105.2643 | -1862.52 | 1411.48 |
| 44 | 3.5038 | 4 | 7.9506  | 83.87 | -116.84 | 32.4840 | 105.2621 | -1687.05 | 1518.02 |
| 45 | 3.4852 | 4 | 11.9259 | 83.87 | -114.38 | 32.4874 | 105.2601 | -1615.02 | 1441.01 |
| 46 | 3.4655 | 4 | 15.9012 | 83.87 | -111.90 | 32.4909 | 105.2583 | -1596.55 | 1250.03 |
| 47 | 3.4450 | 4 | 19.8765 | 83.87 | -109.40 | 32.4945 | 105.2567 | -1596.60 | 1059.10 |
| 48 | 3.4235 | 4 | 23.8518 | 83.87 | -106.89 | 32.4981 | 105.2552 | -1604.56 | 917.45  |
| 49 | 3.4014 | 4 | 27.8271 | 83.87 | -104.35 | 32.5018 | 105.2540 | -1619.02 | 836.34  |
| 50 | 3.5231 | 4 | 3.9585  | 81.74 | -119.29 | 32.4663 | 105.2308 | -1965.96 | 1711.90 |
| 51 | 3.5260 | 4 | 7.9133  | 81.74 | -116.90 | 32.4709 | 105.2280 | -1843.57 | 1880.83 |
| 52 | 3.5291 | 4 | 11.8700 | 81.74 | -114.51 | 32.4756 | 105.2254 | -1784.39 | 1755.08 |
| 53 | 3.5326 | 4 | 15.8267 | 81.74 | -112.12 | 32.4804 | 105.2231 | -1755.52 | 1486.45 |
| 54 | 3.5365 | 4 | 19.7833 | 81.74 | -109.73 | 32.4852 | 105.2211 | -1739.18 | 1222.62 |
| 55 | 3.5408 | 4 | 23.7400 | 81.74 | -107.35 | 32.4902 | 105.2193 | -1731.90 | 1024.12 |
| 56 | 3.5458 | 4 | 27.6967 | 81.74 | -104.97 | 32.4952 | 105.2177 | -1734.72 | 903.54  |
| 57 | 3.5222 | 4 | 3.9344  | 79.61 | -119.28 | 32.4519 | 105.1972 | -2108.58 | 1843.69 |
| 58 | 3.5250 | 4 | 7.8651  | 79.61 | -116.90 | 32.4577 | 105.1938 | -2081.71 | 2048.32 |
| 59 | 3.5280 | 4 | 11.7977 | 79.61 | -114.52 | 32.4636 | 105.1906 | -2035.33 | 1907.66 |
| 60 | 3.5313 | 4 | 15.7302 | 79.61 | -112.15 | 32.4696 | 105.1877 | -1976.51 | 1603.57 |
| 61 | 3.5347 | 4 | 19.6628 | 79.61 | -109.78 | 32.4757 | 105.1851 | -1922.27 | 1301.55 |
| 62 | 3.5384 | 4 | 23.5953 | 79.61 | -107.41 | 32.4819 | 105.1828 | -1883.17 | 1069.96 |
| 63 | 3.5424 | 4 | 27.5279 | 79.61 | -105.04 | 32.4882 | 105.1808 | -1863.76 | 924.27  |
| 64 | 3.5241 | 4 | 3.9048  | 77.48 | -119.28 | 32.4376 | 105.1637 | -2272.24 | 1761.30 |
| 65 | 3.5267 | 4 | 7.8060  | 77.48 | -116.92 | 32.4445 | 105.1596 | -2334.55 | 1943.93 |
| 66 | 3.5305 | 4 | 11.7090 | 77.48 | -114.57 | 32.4516 | 105.1557 | -2306.09 | 1820.64 |
| 67 | 3.5359 | 4 | 15.6120 | 77.48 | -112.21 | 32.4588 | 105.1522 | -2216.79 | 1541.72 |
| 68 | 3.5433 | 4 | 19.5150 | 77.48 | -109.87 | 32.4662 | 105.1490 | -2119.17 | 1255.36 |
| 69 | 3.5530 | 4 | 23.4180 | 77.48 | -107.53 | 32.4736 | 105.1462 | -2041.41 | 1028.98 |
| 70 | 3.5654 | 4 | 27.3210 | 77.48 | -105.19 | 32.4811 | 105.1438 | -1994.00 | 882.13  |
| 71 | 3.5232 | 4 | 3.8698  | 75.34 | -119.27 | 32.4232 | 105.1302 | -2451.60 | 1510.42 |
| 72 | 3.5901 | 4 | 7.7361  | 75.34 | -117.03 | 32.4312 | 105.1251 | -2558.58 | 1614.38 |
| 73 | 3.6598 | 4 | 11.6042 | 75.34 | -114.84 | 32.4393 | 105.1202 | -2537.07 | 1521.08 |
| 74 | 3.7329 | 4 | 15.4722 | 75.34 | -112.69 | 32.4475 | 105.1158 | -2426.36 | 1308.68 |
| 75 | 3.8094 | 4 | 19.3403 | 75.34 | -110.60 | 32.4559 | 105.1116 | -2294.27 | 1081.71 |
| 76 | 3.8898 | 4 | 23.2083 | 75.34 | -108.54 | 32.4644 | 105.1079 | -2182.34 | 896.10  |
| 77 | 3.9744 | 4 | 27.0764 | 75.34 | -106.54 | 32.4730 | 105.1045 | -2108.86 | 773.04  |
| 78 | 3.9707 | 4 | 3.8295  | 73.21 | -125.69 | 32.4056 | 105.0948 | -2610.33 | 1188.70 |
| 79 | 4.0663 | 4 | 7.6555  | 73.21 | -123.65 | 32.4142 | 105.0881 | -2706.43 | 1188.76 |
| 80 | 4.1658 | 4 | 11.4832 | 73.21 | -121.66 | 32.4231 | 105.0817 | -2687.23 | 1105.67 |
| 81 | 4.2687 | 4 | 15.3110 | 73.21 | -119.72 | 32.4322 | 105.0757 | -2568.16 | 961.69  |
| 82 | 4.3747 | 4 | 19.1387 | 73.21 | -117.83 | 32.4414 | 105.0701 | -2417.30 | 811.23  |
| 83 | 4.4834 | 4 | 22.9664 | 73.21 | -115.98 | 32.4507 | 105.0648 | -2283.57 | 687.90  |
| 84 | 4.5946 | 4 | 26.7942 | 73.21 | -114.17 | 32.4602 | 105.0599 | -2193.19 | 607.87  |



|     |        |   |         |       |         |         |          |          |         |
|-----|--------|---|---------|-------|---------|---------|----------|----------|---------|
| 85  | 4.3541 | 4 | 3.7839  | 71.08 | -128.94 | 32.3835 | 105.0581 | -2772.09 | 905.89  |
| 86  | 4.3886 | 4 | 7.5643  | 71.08 | -127.10 | 32.3929 | 105.0499 | -2823.72 | 808.31  |
| 87  | 4.4253 | 4 | 11.3464 | 71.08 | -125.26 | 32.4025 | 105.0421 | -2776.96 | 697.45  |
| 88  | 4.4636 | 4 | 15.1285 | 71.08 | -123.45 | 32.4123 | 105.0346 | -2646.13 | 594.04  |
| 89  | 4.5031 | 4 | 18.9107 | 71.08 | -121.64 | 32.4223 | 105.0275 | -2486.06 | 507.93  |
| 90  | 4.5433 | 4 | 22.6928 | 71.08 | -119.85 | 32.4325 | 105.0208 | -2342.13 | 445.57  |
| 91  | 4.5837 | 4 | 26.4749 | 71.08 | -118.08 | 32.4429 | 105.0145 | -2243.24 | 412.37  |
| 92  | 4.3534 | 4 | 3.7330  | 68.95 | -128.93 | 32.3599 | 105.0211 | -2908.18 | 708.37  |
| 93  | 4.3549 | 4 | 7.4626  | 68.95 | -127.11 | 32.3702 | 105.0119 | -2910.07 | 518.78  |
| 94  | 4.3571 | 4 | 11.1939 | 68.95 | -125.29 | 32.3807 | 105.0030 | -2823.25 | 374.74  |
| 95  | 4.3600 | 4 | 14.9252 | 68.95 | -123.47 | 32.3915 | 104.9946 | -2675.58 | 285.04  |
| 96  | 4.3632 | 4 | 18.6564 | 68.95 | -121.65 | 32.4025 | 104.9866 | -2508.14 | 234.70  |
| 97  | 4.3667 | 4 | 22.3877 | 68.95 | -119.83 | 32.4137 | 104.9789 | -2359.03 | 213.56  |
| 98  | 4.3703 | 4 | 26.1190 | 68.95 | -118.01 | 32.4251 | 104.9717 | -2256.17 | 216.16  |
| 99  | 4.3555 | 4 | 3.6770  | 66.82 | -128.93 | 32.3362 | 104.9841 | -2962.66 | 613.44  |
| 100 | 4.3640 | 4 | 7.3506  | 66.82 | -127.14 | 32.3475 | 104.9740 | -2930.26 | 365.43  |
| 101 | 4.3707 | 4 | 11.0258 | 66.82 | -125.35 | 32.3590 | 104.9643 | -2818.12 | 184.67  |
| 102 | 4.3758 | 4 | 14.7011 | 66.82 | -123.56 | 32.3708 | 104.9550 | -2658.37 | 75.87   |
| 103 | 4.3792 | 4 | 18.3764 | 66.82 | -121.78 | 32.3828 | 104.9462 | -2484.51 | 26.24   |
| 104 | 4.3809 | 4 | 22.0517 | 66.82 | -119.99 | 32.3951 | 104.9378 | -2332.28 | 20.08   |
| 105 | 4.3810 | 4 | 25.7270 | 66.82 | -118.21 | 32.4076 | 104.9299 | -2229.00 | 42.40   |
| 106 | 3.9707 | 4 | 3.6159  | 64.68 | -129.39 | 32.3134 | 104.9488 | -2933.81 | 683.11  |
| 107 | 3.9787 | 4 | 7.2284  | 64.68 | -127.46 | 32.3257 | 104.9377 | -2880.29 | 407.10  |
| 108 | 3.9852 | 4 | 10.8425 | 64.68 | -125.53 | 32.3382 | 104.9272 | -2763.30 | 159.94  |
| 109 | 3.9903 | 4 | 14.4567 | 64.68 | -123.60 | 32.3510 | 104.9171 | -2595.66 | -10.86  |
| 110 | 3.9940 | 4 | 18.0709 | 64.68 | -121.68 | 32.3641 | 104.9075 | -2416.60 | -97.45  |
| 111 | 3.9966 | 4 | 21.6851 | 64.68 | -119.76 | 32.3774 | 104.8985 | -2263.96 | -116.35 |
| 112 | 3.9984 | 4 | 25.2993 | 64.68 | -117.83 | 32.3910 | 104.8899 | -2164.01 | -92.67  |
| 113 | 3.9699 | 4 | 3.5497  | 62.55 | -129.38 | 32.2917 | 104.9152 | -2912.40 | 921.60  |
| 114 | 3.9713 | 4 | 7.0962  | 62.55 | -127.48 | 32.3049 | 104.9033 | -2824.26 | 620.77  |
| 115 | 3.9789 | 4 | 10.6442 | 62.55 | -125.58 | 32.3183 | 104.8918 | -2675.81 | 271.78  |
| 116 | 3.9935 | 4 | 14.1923 | 62.55 | -123.70 | 32.3321 | 104.8809 | -2489.81 | 4.68    |
| 117 | 4.0162 | 4 | 17.7404 | 62.55 | -121.82 | 32.3461 | 104.8705 | -2304.86 | -147.43 |
| 118 | 4.0477 | 4 | 21.2885 | 62.55 | -119.96 | 32.3604 | 104.8606 | -2155.59 | -199.35 |
| 119 | 4.0889 | 4 | 24.8366 | 62.55 | -118.13 | 32.3750 | 104.8512 | -2064.91 | -185.86 |
| 120 | 3.9719 | 4 | 3.4787  | 60.42 | -129.38 | 32.2700 | 104.8817 | -2938.18 | 1286.47 |
| 121 | 4.1511 | 4 | 6.9541  | 60.42 | -127.81 | 32.2834 | 104.8681 | -2756.17 | 923.81  |
| 122 | 4.3326 | 4 | 10.4312 | 60.42 | -126.30 | 32.2972 | 104.8550 | -2535.50 | 481.06  |
| 123 | 4.5176 | 4 | 13.9083 | 60.42 | -124.84 | 32.3113 | 104.8424 | -2327.42 | 103.27  |
| 124 | 4.7071 | 4 | 17.3854 | 60.42 | -123.44 | 32.3257 | 104.8302 | -2145.70 | -134.64 |
| 125 | 4.9024 | 4 | 20.8624 | 60.42 | -122.09 | 32.3403 | 104.8184 | -2011.27 | -234.38 |
| 126 | 5.1042 | 4 | 24.3395 | 60.42 | -120.78 | 32.3552 | 104.8071 | -1942.31 | -237.54 |
| 127 | 4.4786 | 4 | 3.4028  | 58.29 | -139.14 | 32.2421 | 104.8462 | -2959.37 | 1796.40 |

|     |        |   |         |       |         |         |          |          |         |
|-----|--------|---|---------|-------|---------|---------|----------|----------|---------|
| 128 | 4.6474 | 4 | 6.8025  | 58.29 | -137.41 | 32.2554 | 104.8304 | -2591.42 | 1314.27 |
| 129 | 4.8315 | 4 | 10.2037 | 58.29 | -135.75 | 32.2690 | 104.8150 | -2307.38 | 779.31  |
| 130 | 5.0297 | 4 | 13.6050 | 58.29 | -134.17 | 32.2829 | 104.7999 | -2103.57 | 286.67  |
| 131 | 5.2410 | 4 | 17.0062 | 58.29 | -132.67 | 32.2971 | 104.7852 | -1952.61 | -47.54  |
| 132 | 5.4642 | 4 | 20.4075 | 58.29 | -131.23 | 32.3116 | 104.7709 | -1856.13 | -208.88 |
| 133 | 5.6985 | 4 | 23.8087 | 58.29 | -129.87 | 32.3263 | 104.7569 | -1825.43 | -242.90 |
| 134 | 4.4793 | 4 | 3.3222  | 56.16 | -139.13 | 32.2123 | 104.8141 | -3054.20 | 2512.95 |
| 135 | 4.4791 | 4 | 6.7251  | 56.16 | -138.33 | 32.2255 | 104.7966 | -2542.51 | 1794.91 |
| 136 | 4.4960 | 4 | 10.0876 | 56.16 | -137.54 | 32.2389 | 104.7794 | -2212.17 | 1106.56 |
| 137 | 4.5288 | 4 | 13.4501 | 56.16 | -136.75 | 32.2525 | 104.7626 | -1992.55 | 523.39  |
| 138 | 4.5760 | 4 | 16.8127 | 56.16 | -135.96 | 32.2664 | 104.7459 | -1853.38 | 117.10  |
| 139 | 4.6363 | 4 | 20.1752 | 56.16 | -135.17 | 32.2805 | 104.7296 | -1780.64 | -109.97 |
| 140 | 4.7085 | 4 | 23.5377 | 56.16 | -134.39 | 32.2949 | 104.7135 | -1764.83 | -203.53 |
| 141 | 3.9238 | 4 | 3.0607  | 49.92 | -137.41 | 32.1867 | 104.7821 | -3049.35 | 3222.78 |
| 142 | 3.9234 | 4 | 6.1208  | 49.92 | -137.42 | 32.2024 | 104.7620 | -2478.67 | 2629.14 |
| 143 | 3.9229 | 4 | 9.1812  | 49.92 | -137.42 | 32.2180 | 104.7418 | -1880.72 | 2033.08 |
| 144 | 3.9224 | 4 | 12.2416 | 49.92 | -137.42 | 32.2337 | 104.7217 | -1396.17 | 1523.29 |
| 145 | 3.9218 | 4 | 15.3020 | 49.92 | -137.43 | 32.2494 | 104.7015 | -1076.98 | 1146.38 |
| 146 | 3.9212 | 4 | 18.3624 | 49.92 | -137.43 | 32.2650 | 104.6813 | -910.21  | 906.91  |
| 147 | 3.9205 | 4 | 21.4228 | 49.92 | -137.43 | 32.2807 | 104.6612 | -856.31  | 781.99  |
| 148 | 3.9252 | 4 | 3.0601  | 49.91 | -137.42 | 32.1607 | 104.7539 | -2814.59 | 2833.14 |
| 149 | 3.9241 | 4 | 6.1203  | 49.91 | -137.42 | 32.1764 | 104.7338 | -2328.55 | 2239.10 |
| 150 | 3.9231 | 4 | 9.1804  | 49.91 | -137.42 | 32.1921 | 104.7136 | -1778.24 | 1749.67 |
| 151 | 3.9219 | 4 | 12.2405 | 49.91 | -137.42 | 32.2077 | 104.6935 | -1339.27 | 1329.91 |
| 152 | 3.9207 | 4 | 15.3006 | 49.91 | -137.42 | 32.2234 | 104.6733 | -1055.10 | 1008.87 |
| 153 | 3.9195 | 4 | 18.3608 | 49.91 | -137.42 | 32.2391 | 104.6531 | -914.27  | 800.60  |
| 154 | 3.9182 | 4 | 21.4209 | 49.91 | -137.42 | 32.2548 | 104.6330 | -887.01  | 695.29  |
| 155 | 3.9249 | 4 | 3.0596  | 49.90 | -137.40 | 32.1347 | 104.7257 | -2551.20 | 2567.01 |
| 156 | 3.9238 | 4 | 6.1192  | 49.90 | -137.40 | 32.1504 | 104.7056 | -2110.76 | 2055.94 |
| 157 | 3.9228 | 4 | 9.1788  | 49.90 | -137.40 | 32.1661 | 104.6854 | -1717.60 | 1587.66 |
| 158 | 3.9218 | 4 | 12.2383 | 49.90 | -137.40 | 32.1818 | 104.6653 | -1389.62 | 1186.01 |
| 159 | 3.9207 | 4 | 15.2979 | 49.90 | -137.40 | 32.1975 | 104.6451 | -1153.85 | 882.51  |
| 160 | 3.9197 | 4 | 18.3575 | 49.90 | -137.40 | 32.2131 | 104.6249 | -1021.01 | 685.51  |
| 161 | 3.9186 | 4 | 21.4171 | 49.90 | -137.41 | 32.2288 | 104.6048 | -984.48  | 585.98  |
| 162 | 3.9262 | 4 | 3.0590  | 49.89 | -137.40 | 32.1087 | 104.6975 | -2565.03 | 2461.75 |
| 163 | 3.9252 | 4 | 6.1181  | 49.89 | -137.40 | 32.1244 | 104.6774 | -2200.99 | 2026.68 |
| 164 | 3.9248 | 4 | 9.1771  | 49.89 | -137.40 | 32.1401 | 104.6572 | -1870.78 | 1530.19 |
| 165 | 3.9251 | 4 | 12.2362 | 49.89 | -137.40 | 32.1558 | 104.6371 | -1586.28 | 1085.93 |
| 166 | 3.9261 | 4 | 15.2952 | 49.89 | -137.41 | 32.1715 | 104.6169 | -1357.57 | 756.55  |
| 167 | 3.9277 | 4 | 18.3543 | 49.89 | -137.41 | 32.1872 | 104.5967 | -1201.92 | 550.80  |
| 168 | 3.9298 | 4 | 21.4133 | 49.89 | -137.41 | 32.2028 | 104.5766 | -1130.26 | 453.88  |
| 169 | 3.9259 | 4 | 3.0585  | 49.87 | -137.38 | 32.0828 | 104.6693 | -2688.90 | 2414.34 |
| 170 | 3.9995 | 4 | 6.1170  | 49.87 | -137.41 | 32.0982 | 104.6489 | -2410.40 | 1997.29 |

|     |        |   |         |       |         |         |          |          |         |
|-----|--------|---|---------|-------|---------|---------|----------|----------|---------|
| 171 | 4.0725 | 4 | 9.1755  | 49.87 | -137.44 | 32.1136 | 104.6285 | -2132.43 | 1471.69 |
| 172 | 4.1447 | 4 | 12.2340 | 49.87 | -137.47 | 32.1291 | 104.6081 | -1859.29 | 976.46  |
| 173 | 4.2163 | 4 | 15.2925 | 49.87 | -137.50 | 32.1445 | 104.5876 | -1606.44 | 609.33  |
| 174 | 4.2873 | 4 | 18.3510 | 49.87 | -137.53 | 32.1599 | 104.5672 | -1406.81 | 392.21  |
| 175 | 4.3577 | 4 | 21.4095 | 49.87 | -137.55 | 32.1753 | 104.5468 | -1289.03 | 306.46  |
| 176 | 3.7804 | 4 | 3.0580  | 49.86 | -140.70 | 32.0556 | 104.6415 | -2847.02 | 2414.24 |
| 177 | 3.8546 | 4 | 6.1159  | 49.86 | -140.67 | 32.0706 | 104.6206 | -2631.92 | 1987.39 |
| 178 | 3.9281 | 4 | 9.1739  | 49.86 | -140.65 | 32.0855 | 104.5996 | -2391.65 | 1421.46 |
| 179 | 4.0009 | 4 | 12.2318 | 49.86 | -140.62 | 32.1005 | 104.5787 | -2116.07 | 864.77  |
| 180 | 4.0730 | 4 | 15.2898 | 49.86 | -140.59 | 32.1154 | 104.5578 | -1828.90 | 458.93  |
| 181 | 4.1446 | 4 | 18.3478 | 49.86 | -140.57 | 32.1304 | 104.5369 | -1584.58 | 237.17  |
| 182 | 4.2156 | 4 | 21.4057 | 49.86 | -140.55 | 32.1453 | 104.5160 | -1426.53 | 171.40  |
| 183 | 3.7817 | 4 | 3.0574  | 49.85 | -140.71 | 32.0293 | 104.6161 | -3027.63 | 2471.10 |
| 184 | 3.7808 | 4 | 6.1148  | 49.85 | -140.71 | 32.0440 | 104.5949 | -2864.44 | 2006.49 |
| 185 | 3.7805 | 4 | 9.1723  | 49.85 | -140.71 | 32.0587 | 104.5737 | -2618.97 | 1378.14 |
| 186 | 3.7809 | 4 | 12.2297 | 49.85 | -140.71 | 32.0734 | 104.5525 | -2301.18 | 766.00  |
| 187 | 3.7820 | 4 | 15.2871 | 49.85 | -140.71 | 32.0881 | 104.5313 | -1969.53 | 338.20  |
| 188 | 3.7836 | 4 | 18.3445 | 49.85 | -140.72 | 32.1028 | 104.5102 | -1691.39 | 125.14  |
| 189 | 3.7858 | 4 | 21.4019 | 49.85 | -140.72 | 32.1175 | 104.4890 | -1512.84 | 83.40   |
| 190 | 3.7813 | 4 | 3.0569  | 49.84 | -140.69 | 32.0030 | 104.5907 | -3177.68 | 2575.91 |
| 191 | 3.7801 | 4 | 6.1138  | 49.84 | -140.69 | 32.0177 | 104.5695 | -3039.15 | 2053.63 |
| 192 | 3.7789 | 4 | 9.1706  | 49.84 | -140.69 | 32.0324 | 104.5483 | -2762.22 | 1346.86 |
| 193 | 3.7776 | 4 | 12.2275 | 49.84 | -140.69 | 32.0471 | 104.5271 | -2390.11 | 699.63  |
| 194 | 3.7764 | 4 | 15.2844 | 49.84 | -140.69 | 32.0618 | 104.5060 | -2017.83 | 273.36  |
| 195 | 3.7752 | 4 | 18.3413 | 49.84 | -140.70 | 32.0765 | 104.4848 | -1721.02 | 81.09   |
| 196 | 3.7740 | 4 | 21.3981 | 49.84 | -140.70 | 32.0912 | 104.4636 | -1540.99 | 65.83   |
| 197 | 3.7832 | 4 | 3.0563  | 49.83 | -140.68 | 31.9767 | 104.5653 | -3271.85 | 2741.27 |
| 198 | 3.7822 | 4 | 6.1127  | 49.83 | -140.68 | 31.9914 | 104.5441 | -3122.77 | 2156.02 |
| 199 | 3.7813 | 4 | 9.1690  | 49.83 | -140.68 | 32.0061 | 104.5229 | -2792.97 | 1375.95 |
| 200 | 3.7803 | 4 | 12.2253 | 49.83 | -140.68 | 32.0208 | 104.5018 | -2370.56 | 714.22  |
| 201 | 3.7793 | 4 | 15.2817 | 49.83 | -140.69 | 32.0355 | 104.4806 | -1976.59 | 306.98  |
| 202 | 3.7783 | 4 | 18.3380 | 49.83 | -140.69 | 32.0502 | 104.4594 | -1683.76 | 139.07  |
| 203 | 3.7774 | 4 | 21.3943 | 49.83 | -140.69 | 32.0649 | 104.4382 | -1522.22 | 143.37  |
| 204 | 3.7822 | 4 | 3.0558  | 49.81 | -140.67 | 31.9504 | 104.5399 | -3302.69 | 2979.43 |
| 205 | 3.7812 | 4 | 6.1116  | 49.81 | -140.67 | 31.9651 | 104.5187 | -3091.12 | 2339.36 |
| 206 | 3.7802 | 4 | 9.1674  | 49.81 | -140.68 | 31.9798 | 104.4975 | -2689.69 | 1513.00 |
| 207 | 3.7793 | 4 | 12.2232 | 49.81 | -140.68 | 31.9945 | 104.4764 | -2239.62 | 863.65  |
| 208 | 3.7783 | 4 | 15.2790 | 49.81 | -140.68 | 32.0092 | 104.4552 | -1860.60 | 480.34  |
| 209 | 3.7774 | 4 | 18.3347 | 49.81 | -140.68 | 32.0239 | 104.4340 | -1603.00 | 324.74  |
| 210 | 3.7764 | 4 | 21.3905 | 49.81 | -140.68 | 32.0386 | 104.4128 | -1480.89 | 329.36  |
| 211 | 3.7826 | 4 | 3.0552  | 49.80 | -140.66 | 31.9241 | 104.5145 | -3281.39 | 3286.91 |
| 212 | 3.7819 | 4 | 6.1105  | 49.80 | -140.67 | 31.9388 | 104.4933 | -2915.65 | 2645.35 |
| 213 | 3.7811 | 4 | 9.1657  | 49.80 | -140.67 | 31.9535 | 104.4721 | -2455.02 | 1830.95 |

|     |        |   |         |       |         |         |          |          |         |
|-----|--------|---|---------|-------|---------|---------|----------|----------|---------|
| 214 | 3.7804 | 4 | 12.2210 | 49.80 | -140.67 | 31.9682 | 104.4510 | -2032.23 | 1204.81 |
| 215 | 3.7797 | 4 | 15.2762 | 49.80 | -140.67 | 31.9829 | 104.4298 | -1715.08 | 822.81  |
| 216 | 3.7790 | 4 | 18.3315 | 49.80 | -140.67 | 31.9976 | 104.4086 | -1521.70 | 645.81  |
| 217 | 3.7782 | 4 | 21.3867 | 49.80 | -140.67 | 32.0124 | 104.3874 | -1452.88 | 618.10  |
| 218 | 3.7839 | 4 | 3.0547  | 49.79 | -140.67 | 31.8978 | 104.4891 | -3338.99 | 3672.20 |
| 219 | 3.7829 | 4 | 6.1094  | 49.79 | -140.67 | 31.9125 | 104.4679 | -2803.46 | 3092.84 |
| 220 | 3.7820 | 4 | 9.1641  | 49.79 | -140.67 | 31.9272 | 104.4467 | -2276.57 | 2353.19 |
| 221 | 3.7810 | 4 | 12.2188 | 49.79 | -140.67 | 31.9419 | 104.4256 | -1884.45 | 1737.84 |
| 222 | 3.7800 | 4 | 15.2735 | 49.79 | -140.67 | 31.9566 | 104.4044 | -1634.16 | 1315.97 |
| 223 | 3.7791 | 4 | 18.3282 | 49.79 | -140.67 | 31.9714 | 104.3832 | -1503.28 | 1073.61 |
| 224 | 3.7781 | 4 | 21.3829 | 49.79 | -140.68 | 31.9861 | 104.3621 | -1478.89 | 977.16  |
| 225 | 3.7835 | 4 | 3.0542  | 49.78 | -140.65 | 31.8715 | 104.4637 | -3624.10 | 4157.16 |
| 226 | 3.7774 | 4 | 6.1083  | 49.78 | -140.65 | 31.8862 | 104.4425 | -2963.34 | 3602.91 |
| 227 | 3.7713 | 4 | 9.1625  | 49.78 | -140.65 | 31.9009 | 104.4214 | -2344.75 | 2942.05 |
| 228 | 3.7653 | 4 | 12.2166 | 49.78 | -140.65 | 31.9157 | 104.4002 | -1935.38 | 2343.43 |
| 229 | 3.7593 | 4 | 15.2708 | 49.78 | -140.65 | 31.9304 | 104.3791 | -1709.68 | 1864.43 |
| 230 | 3.7537 | 4 | 18.3250 | 49.78 | -140.66 | 31.9452 | 104.3579 | -1601.58 | 1531.68 |
| 231 | 3.7487 | 4 | 21.3791 | 49.78 | -140.66 | 31.9599 | 104.3368 | -1586.58 | 1346.33 |
| 232 | 4.1996 | 4 | 3.0536  | 49.77 | -140.42 | 31.8438 | 104.4369 | -4203.44 | 4775.00 |
| 233 | 4.1942 | 4 | 6.1072  | 49.77 | -140.43 | 31.8586 | 104.4158 | -3350.40 | 4088.58 |
| 234 | 4.2008 | 4 | 9.1609  | 49.77 | -140.43 | 31.8733 | 104.3946 | -2639.88 | 3442.75 |
| 235 | 4.2228 | 4 | 12.2145 | 49.77 | -140.43 | 31.8880 | 104.3734 | -2202.11 | 2861.61 |
| 236 | 4.2652 | 4 | 15.2681 | 49.77 | -140.45 | 31.9026 | 104.3521 | -1960.38 | 2331.07 |
| 237 | 4.3361 | 4 | 18.3217 | 49.77 | -129.65 | 31.9171 | 104.3308 | -1817.58 | 1915.74 |
| 238 | 4.4499 | 4 | 21.3753 | 49.77 | -129.35 | 31.9315 | 104.3092 | -1769.82 | 1652.21 |
| 239 | 4.2004 | 4 | 3.0531  | 49.75 | -140.43 | 31.8147 | 104.4086 | -4991.87 | 5596.42 |
| 240 | 3.8958 | 4 | 6.1062  | 49.75 | -140.97 | 31.8303 | 104.3885 | -3820.50 | 4394.59 |
| 241 | 3.5782 | 4 | 9.1592  | 49.75 | -141.66 | 31.8458 | 104.3684 | -3078.96 | 3688.54 |
| 242 | 3.2442 | 4 | 12.2123 | 49.75 | -142.56 | 31.8611 | 104.3481 | -2631.09 | 3114.12 |
| 243 | 2.8885 | 4 | 15.2654 | 49.75 | -143.83 | 31.8763 | 104.3278 | -2342.42 | 2564.45 |
| 244 | 3.0320 | 4 | 18.3185 | 49.75 | -129.65 | 31.8970 | 104.3079 | -2133.25 | 2118.13 |
| 245 | 2.8591 | 4 | 21.3715 | 49.75 | -129.35 | 31.9119 | 104.2871 | -2018.22 | 1827.85 |
| 246 | 3.7265 | 4 | 3.0525  | 49.74 | -126.81 | 31.7939 | 104.3833 | -4437.94 | 4609.13 |
| 247 | 3.4212 | 4 | 6.1051  | 49.74 | -126.20 | 31.8117 | 104.3660 | -3846.31 | 4016.88 |
| 248 | 3.1047 | 4 | 9.1576  | 49.74 | -125.41 | 31.8296 | 104.3488 | -3350.07 | 3546.41 |
| 249 | 2.7741 | 4 | 12.2101 | 49.74 | -124.35 | 31.8476 | 104.3318 | -2972.06 | 3059.13 |
| 250 | 2.4254 | 4 | 15.2627 | 49.74 | -122.84 | 31.8657 | 104.3152 | -2661.29 | 2549.33 |
| 251 | 3.0323 | 4 | 18.3152 | 49.74 | -129.64 | 31.8797 | 104.2832 | -2417.59 | 2126.26 |
| 252 | 2.8594 | 4 | 21.3677 | 49.74 | -129.34 | 31.8956 | 104.2637 | -2244.52 | 1859.10 |
| 253 | 3.7263 | 4 | 3.0520  | 49.73 | -126.79 | 31.7738 | 104.3518 | -4060.60 | 3938.47 |
| 254 | 3.7251 | 4 | 6.1040  | 49.73 | -126.79 | 31.7925 | 104.3354 | -3830.42 | 3574.42 |
| 255 | 3.7377 | 4 | 9.1560  | 49.73 | -126.79 | 31.8111 | 104.3191 | -3561.06 | 3228.79 |
| 256 | 3.7680 | 4 | 12.2080 | 49.73 | -126.78 | 31.8298 | 104.3028 | -3253.11 | 2803.34 |

|     |        |   |         |       |         |         |          |          |         |
|-----|--------|---|---------|-------|---------|---------|----------|----------|---------|
| 257 | 3.8222 | 4 | 15.2599 | 49.73 | -126.76 | 31.8486 | 104.2867 | -2919.29 | 2341.85 |
| 258 | 3.0326 | 4 | 18.3119 | 49.73 | -129.64 | 31.8623 | 104.2585 | -2618.57 | 1972.76 |
| 259 | 2.8597 | 4 | 21.3639 | 49.73 | -129.32 | 31.8793 | 104.2403 | -2400.38 | 1767.63 |
| 260 | 3.7283 | 4 | 3.0514  | 49.72 | -126.79 | 31.7538 | 104.3202 | -3733.45 | 3460.58 |
| 261 | 3.7273 | 4 | 6.1029  | 49.72 | -126.79 | 31.7724 | 104.3038 | -3692.33 | 3156.05 |
| 262 | 3.7262 | 4 | 9.1543  | 49.72 | -126.79 | 31.7910 | 104.2874 | -3567.80 | 2802.25 |
| 263 | 3.7252 | 4 | 12.2058 | 49.72 | -126.79 | 31.8097 | 104.2711 | -3316.84 | 2383.54 |
| 264 | 3.7244 | 4 | 15.2572 | 49.72 | -126.79 | 31.8283 | 104.2547 | -2989.08 | 1985.01 |
| 265 | 3.0330 | 4 | 18.3087 | 49.72 | -126.79 | 31.8449 | 104.2338 | -2674.18 | 1717.62 |
| 266 | 2.8923 | 4 | 21.3601 | 49.72 | -126.78 | 31.8629 | 104.2167 | -2450.23 | 1601.82 |
| 267 | 3.7274 | 4 | 3.0509  | 49.71 | -126.78 | 31.7337 | 104.2887 | -3399.84 | 3140.20 |
| 268 | 3.7265 | 4 | 6.1018  | 49.71 | -126.78 | 31.7523 | 104.2723 | -3401.95 | 2829.63 |
| 269 | 3.7257 | 4 | 9.1527  | 49.71 | -126.78 | 31.7710 | 104.2559 | -3324.73 | 2413.22 |
| 270 | 3.7249 | 4 | 12.2036 | 49.71 | -126.78 | 31.7896 | 104.2395 | -3117.87 | 1976.21 |
| 271 | 3.7241 | 4 | 15.2545 | 49.71 | -126.78 | 31.8082 | 104.2231 | -2839.45 | 1633.27 |
| 272 | 3.7233 | 4 | 18.3054 | 49.71 | -126.77 | 31.8269 | 104.2067 | -2576.48 | 1453.72 |
| 273 | 3.7224 | 4 | 21.3563 | 49.71 | -126.77 | 31.8455 | 104.1903 | -2391.63 | 1425.28 |
| 274 | 3.7286 | 4 | 3.0504  | 49.69 | -126.79 | 31.7136 | 104.2571 | -3065.98 | 2955.58 |
| 275 | 3.7275 | 4 | 6.1007  | 49.69 | -126.79 | 31.7323 | 104.2407 | -3017.10 | 2632.17 |
| 276 | 3.7265 | 4 | 9.1511  | 49.69 | -126.79 | 31.7509 | 104.2243 | -2917.39 | 2168.86 |
| 277 | 3.7255 | 4 | 12.2014 | 49.69 | -126.78 | 31.7695 | 104.2079 | -2744.09 | 1723.06 |
| 278 | 3.7245 | 4 | 15.2518 | 49.69 | -126.78 | 31.7882 | 104.1915 | -2540.51 | 1419.21 |
| 279 | 3.7235 | 4 | 18.3021 | 49.69 | -126.78 | 31.8068 | 104.1752 | -2363.40 | 1295.72 |
| 280 | 3.7224 | 4 | 21.3525 | 49.69 | -126.78 | 31.8255 | 104.1588 | -2252.62 | 1316.74 |
| 281 | 3.7284 | 4 | 3.0498  | 49.68 | -126.77 | 31.6936 | 104.2255 | -2777.98 | 2888.43 |
| 282 | 3.7272 | 4 | 6.0996  | 49.68 | -126.77 | 31.7122 | 104.2092 | -2645.92 | 2574.56 |
| 283 | 3.7260 | 4 | 9.1494  | 49.68 | -126.77 | 31.7309 | 104.1928 | -2501.12 | 2116.40 |
| 284 | 3.7248 | 4 | 12.1993 | 49.68 | -126.76 | 31.7495 | 104.1764 | -2352.38 | 1680.81 |
| 285 | 3.7235 | 4 | 15.2491 | 49.68 | -126.76 | 31.7681 | 104.1600 | -2218.90 | 1394.35 |
| 286 | 3.7223 | 4 | 18.2989 | 49.68 | -126.76 | 31.7868 | 104.1436 | -2125.36 | 1284.74 |
| 287 | 3.7211 | 4 | 21.3487 | 49.68 | -126.76 | 31.8054 | 104.1272 | -2088.80 | 1309.23 |
| 288 | 3.7303 | 4 | 3.0493  | 49.67 | -126.77 | 31.6735 | 104.1940 | -2586.89 | 2912.69 |
| 289 | 3.7293 | 4 | 6.0985  | 49.67 | -126.77 | 31.6922 | 104.1776 | -2406.89 | 2629.57 |
| 290 | 3.7283 | 4 | 9.1478  | 49.67 | -126.77 | 31.7108 | 104.1612 | -2223.95 | 2214.92 |
| 291 | 3.7278 | 4 | 12.1971 | 49.67 | -126.76 | 31.7295 | 104.1448 | -2078.12 | 1806.89 |
| 292 | 3.7291 | 4 | 15.2463 | 49.67 | -126.76 | 31.7481 | 104.1284 | -1983.67 | 1524.69 |
| 293 | 3.7335 | 4 | 18.2956 | 49.67 | -126.76 | 31.7667 | 104.1120 | -1943.05 | 1398.87 |
| 294 | 3.7426 | 4 | 21.3449 | 49.67 | -126.76 | 31.7854 | 104.0956 | -1955.33 | 1394.08 |
| 295 | 3.7294 | 4 | 3.0487  | 49.66 | -126.76 | 31.6534 | 104.1624 | -2499.76 | 2984.46 |
| 296 | 3.7286 | 4 | 6.0975  | 49.66 | -126.76 | 31.6721 | 104.1460 | -2309.59 | 2742.41 |
| 297 | 3.7904 | 4 | 9.1462  | 49.66 | -126.78 | 31.6906 | 104.1294 | -2112.28 | 2380.82 |
| 298 | 3.9060 | 4 | 12.1949 | 49.66 | -126.85 | 31.7089 | 104.1125 | -1962.80 | 2010.99 |
| 299 | 4.0683 | 4 | 15.2436 | 49.66 | -126.99 | 31.7270 | 104.0954 | -1879.40 | 1731.70 |

|     |        |   |         |       |         |         |          |          |         |
|-----|--------|---|---------|-------|---------|---------|----------|----------|---------|
| 300 | 4.2710 | 4 | 18.2924 | 49.66 | -127.20 | 31.7450 | 104.0781 | -1856.90 | 1579.56 |
| 301 | 4.5092 | 4 | 21.3411 | 49.66 | -127.46 | 31.7628 | 104.0605 | -1886.42 | 1534.87 |
| 302 | 3.7306 | 4 | 3.0482  | 49.64 | -126.76 | 31.6334 | 104.1308 | -2487.78 | 3053.80 |
| 303 | 4.0654 | 4 | 6.2487  | 49.64 | -129.53 | 31.6497 | 104.1127 | -2310.61 | 2863.37 |
| 304 | 4.4245 | 4 | 9.3730  | 49.64 | -131.92 | 31.6657 | 104.0941 | -2123.86 | 2553.67 |
| 305 | 4.8083 | 4 | 12.4973 | 49.64 | -133.99 | 31.6814 | 104.0751 | -1984.73 | 2221.23 |
| 306 | 5.2163 | 4 | 15.6217 | 49.64 | -135.80 | 31.6968 | 104.0558 | -1907.62 | 1947.88 |
| 307 | 5.6481 | 4 | 18.7460 | 49.64 | -137.39 | 31.7119 | 104.0363 | -1883.74 | 1773.48 |
| 308 | 6.1034 | 4 | 21.8703 | 49.64 | -138.80 | 31.7267 | 104.0164 | -1899.68 | 1691.82 |
| 309 | 7.2189 | 4 | 3.2761  | 54.99 | -143.51 | 31.5908 | 104.0893 | -2521.42 | 3097.34 |
| 310 | 7.3690 | 4 | 6.3928  | 54.99 | -144.34 | 31.6052 | 104.0711 | -2367.57 | 2965.66 |
| 311 | 7.4575 | 4 | 9.5891  | 54.99 | -145.29 | 31.6193 | 104.0526 | -2209.16 | 2703.90 |
| 312 | 7.4914 | 4 | 12.7855 | 54.99 | -146.34 | 31.6331 | 104.0337 | -2093.28 | 2400.16 |
| 313 | 7.4765 | 4 | 15.9819 | 54.99 | -147.48 | 31.6465 | 104.0146 | -2019.34 | 2129.58 |
| 314 | 7.4170 | 4 | 19.1783 | 54.99 | -148.71 | 31.6597 | 103.9951 | -1978.55 | 1938.07 |
| 315 | 7.3160 | 4 | 22.3746 | 54.99 | -150.06 | 31.6725 | 103.9755 | -1960.27 | 1827.31 |
| 316 | 4.2855 | 4 | 3.2649  | 54.71 | -132.39 | 31.5548 | 104.0530 | -2563.47 | 2980.46 |
| 317 | 4.2999 | 4 | 6.5297  | 54.71 | -132.22 | 31.5687 | 104.0350 | -2448.45 | 2885.40 |
| 318 | 4.2904 | 4 | 9.7945  | 54.71 | -131.99 | 31.5825 | 104.0170 | -2320.82 | 2691.63 |
| 319 | 4.2555 | 4 | 13.0594 | 54.71 | -131.68 | 31.5964 | 103.9990 | -2207.97 | 2432.73 |
| 320 | 4.1936 | 4 | 16.3242 | 54.71 | -131.27 | 31.6103 | 103.9811 | -2112.62 | 2185.86 |
| 321 | 4.1035 | 4 | 19.5890 | 54.71 | -130.75 | 31.6241 | 103.9632 | -2041.11 | 2005.00 |
| 322 | 3.9837 | 4 | 22.8539 | 54.71 | -130.07 | 31.6380 | 103.9454 | -1999.96 | 1899.63 |
| 323 | 5.6041 | 4 | 3.2536  | 54.43 | -144.11 | 31.5183 | 104.0155 | -2617.65 | 2841.95 |
| 324 | 5.7829 | 4 | 6.5071  | 54.43 | -143.74 | 31.5317 | 103.9967 | -2556.68 | 2770.30 |
| 325 | 5.9605 | 4 | 9.7606  | 54.43 | -143.38 | 31.5452 | 103.9780 | -2451.58 | 2613.47 |
| 326 | 6.1381 | 4 | 13.0142 | 54.43 | -143.04 | 31.5587 | 103.9593 | -2329.23 | 2381.95 |
| 327 | 6.3174 | 4 | 16.2677 | 54.43 | -142.71 | 31.5723 | 103.9408 | -2209.20 | 2158.13 |
| 328 | 6.5002 | 4 | 19.5212 | 54.43 | -142.39 | 31.5860 | 103.9223 | -2108.91 | 2001.35 |
| 329 | 6.6887 | 4 | 22.7748 | 54.43 | -142.06 | 31.5997 | 103.9039 | -2039.84 | 1922.43 |
| 330 | 4.1378 | 4 | 3.2422  | 54.15 | -141.40 | 31.4843 | 103.9852 | -2644.33 | 2671.96 |
| 331 | 4.0819 | 4 | 6.4843  | 54.15 | -141.17 | 31.4973 | 103.9657 | -2590.39 | 2589.98 |
| 332 | 4.0294 | 4 | 9.7265  | 54.15 | -140.94 | 31.5104 | 103.9464 | -2489.15 | 2445.00 |
| 333 | 3.9799 | 4 | 12.9687 | 54.15 | -140.71 | 31.5235 | 103.9271 | -2358.98 | 2254.68 |
| 334 | 3.9331 | 4 | 16.2108 | 54.15 | -140.47 | 31.5368 | 103.9079 | -2226.76 | 2082.93 |
| 335 | 3.8887 | 4 | 19.4530 | 54.15 | -140.24 | 31.5501 | 103.8887 | -2116.88 | 1973.45 |
| 336 | 3.8467 | 4 | 22.6952 | 54.15 | -140.00 | 31.5635 | 103.8696 | -2042.88 | 1930.15 |
| 337 | 4.1383 | 4 | 3.2307  | 53.87 | -141.39 | 31.4553 | 103.9578 | -2666.85 | 2509.11 |
| 338 | 4.1180 | 4 | 6.4614  | 53.87 | -141.18 | 31.4686 | 103.9385 | -2601.16 | 2415.07 |
| 339 | 4.0993 | 4 | 9.6921  | 53.87 | -140.97 | 31.4821 | 103.9192 | -2476.70 | 2280.04 |
| 340 | 4.0821 | 4 | 12.9229 | 53.87 | -140.77 | 31.4955 | 103.9000 | -2326.60 | 2126.78 |
| 341 | 4.0665 | 4 | 16.1536 | 53.87 | -140.56 | 31.5091 | 103.8809 | -2186.29 | 2006.31 |
| 342 | 4.0524 | 4 | 19.3843 | 53.87 | -140.34 | 31.5227 | 103.8618 | -2078.42 | 1945.93 |

|     |        |   |         |       |         |         |          |          |         |
|-----|--------|---|---------|-------|---------|---------|----------|----------|---------|
| 343 | 4.0400 | 4 | 22.6150 | 53.87 | -140.13 | 31.5363 | 103.8427 | -2011.69 | 1941.73 |
| 344 | 5.5323 | 4 | 3.2192  | 53.59 | -140.45 | 31.4219 | 103.9258 | -2688.18 | 2371.55 |
| 345 | 5.5118 | 4 | 6.4384  | 53.59 | -140.29 | 31.4355 | 103.9065 | -2586.69 | 2250.03 |
| 346 | 5.4929 | 4 | 9.6576  | 53.59 | -140.14 | 31.4491 | 103.8872 | -2407.95 | 2134.88 |
| 347 | 5.4758 | 4 | 12.8767 | 53.59 | -139.98 | 31.4628 | 103.8680 | -2230.64 | 2033.94 |
| 348 | 5.4604 | 4 | 16.0959 | 53.59 | -139.82 | 31.4765 | 103.8488 | -2091.75 | 1969.39 |
| 349 | 5.4468 | 4 | 19.3151 | 53.59 | -139.67 | 31.4902 | 103.8296 | -2000.10 | 1954.71 |
| 350 | 5.4350 | 4 | 22.5343 | 53.59 | -139.51 | 31.5041 | 103.8105 | -1954.08 | 1984.76 |
| 351 | 5.5323 | 4 | 3.2076  | 53.31 | -140.43 | 31.3837 | 103.8885 | -2671.15 | 2281.57 |
| 352 | 5.4498 | 4 | 6.4152  | 53.31 | -140.30 | 31.3977 | 103.8695 | -2478.46 | 2155.20 |
| 353 | 5.3652 | 4 | 9.6227  | 53.31 | -140.18 | 31.4117 | 103.8504 | -2255.07 | 2100.93 |
| 354 | 5.2784 | 4 | 12.8303 | 53.31 | -140.05 | 31.4258 | 103.8314 | -2082.81 | 2069.04 |
| 355 | 5.1891 | 4 | 16.0379 | 53.31 | -139.93 | 31.4399 | 103.8124 | -1972.16 | 2051.01 |
| 356 | 5.0973 | 4 | 19.2455 | 53.31 | -139.80 | 31.4541 | 103.7935 | -1912.51 | 2057.50 |
| 357 | 5.0025 | 4 | 22.4531 | 53.31 | -139.68 | 31.4684 | 103.7747 | -1893.29 | 2091.02 |
| 358 | 4.0437 | 4 | 3.1959  | 53.03 | -136.55 | 31.3525 | 103.8564 | -2544.55 | 2361.13 |
| 359 | 3.9616 | 4 | 6.3918  | 53.03 | -136.30 | 31.3671 | 103.8378 | -2304.49 | 2262.70 |
| 360 | 3.8778 | 4 | 9.5877  | 53.03 | -136.03 | 31.3819 | 103.8192 | -2090.32 | 2264.59 |
| 361 | 3.7923 | 4 | 12.7836 | 53.03 | -135.76 | 31.3967 | 103.8008 | -1954.40 | 2267.11 |
| 362 | 3.7050 | 4 | 15.9795 | 53.03 | -135.48 | 31.4115 | 103.7824 | -1881.08 | 2254.33 |
| 363 | 3.6160 | 4 | 19.1754 | 53.03 | -135.19 | 31.4265 | 103.7640 | -1849.83 | 2244.79 |
| 364 | 3.5252 | 4 | 22.3713 | 53.03 | -134.88 | 31.4414 | 103.7458 | -1848.53 | 2251.84 |
| 365 | 4.0441 | 4 | 3.1842  | 52.75 | -136.52 | 31.3262 | 103.8270 | -2361.49 | 2639.48 |
| 366 | 4.0431 | 4 | 6.3683  | 52.75 | -136.31 | 31.3412 | 103.8085 | -2142.08 | 2556.16 |
| 367 | 4.0433 | 4 | 9.5524  | 52.75 | -136.10 | 31.3563 | 103.7902 | -1974.08 | 2573.09 |
| 368 | 4.0447 | 4 | 12.7366 | 52.75 | -135.89 | 31.3715 | 103.7719 | -1879.95 | 2565.81 |
| 369 | 4.0476 | 4 | 15.9207 | 52.75 | -135.68 | 31.3867 | 103.7536 | -1836.92 | 2520.58 |
| 370 | 4.0522 | 4 | 19.1048 | 52.75 | -135.47 | 31.4020 | 103.7354 | -1822.42 | 2467.99 |
| 371 | 4.0589 | 4 | 22.2890 | 52.75 | -135.26 | 31.4173 | 103.7173 | -1827.60 | 2434.88 |
| 372 | 4.0448 | 4 | 3.1723  | 52.47 | -136.53 | 31.2999 | 103.7976 | -2290.25 | 3058.44 |
| 373 | 4.0720 | 4 | 6.3446  | 52.47 | -136.33 | 31.3149 | 103.7789 | -2131.91 | 2961.90 |
| 374 | 4.0998 | 4 | 9.5169  | 52.47 | -136.13 | 31.3300 | 103.7603 | -1985.04 | 2955.07 |
| 375 | 4.1283 | 4 | 12.6892 | 52.47 | -135.93 | 31.3452 | 103.7418 | -1902.43 | 2913.39 |
| 376 | 4.1573 | 4 | 15.8615 | 52.47 | -135.73 | 31.3604 | 103.7233 | -1862.96 | 2811.83 |
| 377 | 4.1870 | 4 | 19.0339 | 52.47 | -135.53 | 31.3756 | 103.7049 | -1841.69 | 2697.62 |
| 378 | 4.2175 | 4 | 22.2062 | 52.47 | -135.34 | 31.3909 | 103.6865 | -1833.48 | 2614.02 |
| 379 | 4.6425 | 4 | 3.1604  | 52.20 | -137.82 | 31.2709 | 103.7660 | -2311.23 | 3537.52 |
| 380 | 4.6688 | 4 | 6.3208  | 52.20 | -137.64 | 31.2859 | 103.7471 | -2222.46 | 3352.27 |
| 381 | 4.7021 | 4 | 9.4812  | 52.20 | -137.46 | 31.3009 | 103.7281 | -2088.50 | 3323.25 |
| 382 | 4.7407 | 4 | 12.6416 | 52.20 | -137.28 | 31.3159 | 103.7092 | -2001.26 | 3245.92 |
| 383 | 4.7835 | 4 | 15.8020 | 52.20 | -137.10 | 31.3309 | 103.6904 | -1942.95 | 3077.98 |
| 384 | 4.8299 | 4 | 18.9624 | 52.20 | -136.93 | 31.3460 | 103.6715 | -1892.44 | 2893.52 |
| 385 | 4.8800 | 4 | 22.1228 | 52.20 | -136.75 | 31.3612 | 103.6528 | -1851.90 | 2757.61 |

|     |        |   |         |       |         |         |          |          |         |
|-----|--------|---|---------|-------|---------|---------|----------|----------|---------|
| 386 | 4.6423 | 4 | 3.1484  | 51.92 | -137.81 | 31.2401 | 103.7331 | -2281.87 | 4102.40 |
| 387 | 4.8877 | 4 | 6.2968  | 51.92 | -137.93 | 31.2541 | 103.7131 | -2227.30 | 3818.88 |
| 388 | 5.1065 | 4 | 9.4453  | 51.92 | -137.97 | 31.2682 | 103.6931 | -2157.73 | 3714.68 |
| 389 | 5.3037 | 4 | 12.5937 | 51.92 | -137.97 | 31.2824 | 103.6733 | -2096.21 | 3549.36 |
| 390 | 5.4874 | 4 | 15.7421 | 51.92 | -134.25 | 31.2967 | 103.6535 | -2022.53 | 3290.36 |
| 391 | 5.6728 | 4 | 18.8905 | 51.92 | -132.32 | 31.3110 | 103.6338 | -1934.34 | 3028.61 |
| 392 | 5.8895 | 4 | 22.0389 | 51.92 | -131.34 | 31.3253 | 103.6139 | -1853.05 | 2841.50 |
| 393 | 7.0873 | 4 | 3.1364  | 51.64 | -149.26 | 31.1938 | 103.6945 | -2210.47 | 4793.06 |
| 394 | 6.8741 | 4 | 6.0175  | 51.64 | -147.83 | 31.2086 | 103.6738 | -2161.99 | 4487.07 |
| 395 | 6.5470 | 4 | 9.0262  | 51.64 | -146.64 | 31.2240 | 103.6537 | -2163.14 | 4204.19 |
| 396 | 6.0881 | 4 | 12.0349 | 51.64 | -145.83 | 31.2397 | 103.6343 | -2128.52 | 3855.41 |
| 397 | 3.6678 | 4 | 15.6819 | 51.64 | -134.24 | 31.2692 | 103.6226 | -2044.37 | 3459.15 |
| 398 | 3.0198 | 4 | 18.8183 | 51.64 | -130.45 | 31.2858 | 103.6048 | -1922.27 | 3105.97 |
| 399 | 2.2549 | 4 | 21.9547 | 51.64 | -126.72 | 31.3022 | 103.5876 | -1805.73 | 2853.37 |
| 400 | 3.7050 | 4 | 2.7414  | 43.26 | -130.87 | 31.1639 | 103.6631 | -2402.58 | 5399.56 |
| 401 | 3.3240 | 4 | 5.7461  | 43.26 | -126.07 | 31.1829 | 103.6445 | -2358.21 | 5050.42 |
| 402 | 2.9997 | 4 | 8.6191  | 43.26 | -120.37 | 31.2029 | 103.6275 | -2276.31 | 4605.85 |
| 403 | 2.7320 | 4 | 11.4922 | 43.26 | -113.67 | 31.2236 | 103.6125 | -2169.10 | 4105.50 |
| 404 | 3.6683 | 4 | 13.7069 | 43.26 | -105.83 | 31.2489 | 103.5918 | -2042.24 | 3584.10 |
| 405 | 3.5111 | 4 | 16.4483 | 43.26 | -96.49  | 31.2698 | 103.5767 | -1869.87 | 3110.58 |
| 406 | 3.0272 | 4 | 19.1896 | 43.26 | -84.70  | 31.2916 | 103.5648 | -1695.14 | 2750.68 |
| 407 | 3.7055 | 4 | 2.7414  | 43.26 | -130.86 | 31.1421 | 103.6337 | -2631.71 | 5871.93 |
| 408 | 3.7044 | 4 | 5.4828  | 43.26 | -130.87 | 31.1619 | 103.6137 | -2534.43 | 5441.83 |
| 409 | 3.8253 | 4 | 8.2241  | 43.26 | -130.80 | 31.1820 | 103.5942 | -2336.63 | 4893.87 |
| 410 | 4.0901 | 4 | 10.9655 | 43.26 | -130.48 | 31.2027 | 103.5754 | -2131.17 | 4300.23 |
| 411 | 4.5211 | 4 | 13.7069 | 43.26 | -129.70 | 31.2238 | 103.5577 | -1933.26 | 3674.99 |
| 412 | 5.1415 | 4 | 16.4483 | 43.26 | -128.32 | 31.2455 | 103.5414 | -1721.31 | 3067.09 |
| 413 | 5.9781 | 4 | 19.1896 | 43.26 | -126.24 | 31.2678 | 103.5269 | -1477.42 | 2494.98 |
| 414 | 3.7060 | 4 | 2.7414  | 43.26 | -130.85 | 31.1203 | 103.6043 | -2810.67 | 6046.85 |
| 415 | 3.7052 | 4 | 5.4828  | 43.26 | -130.86 | 31.1401 | 103.5842 | -2569.51 | 5594.28 |
| 416 | 3.7044 | 4 | 8.2241  | 43.26 | -130.87 | 31.1599 | 103.5642 | -2280.26 | 5013.42 |
| 417 | 3.7056 | 4 | 10.9655 | 43.26 | -130.88 | 31.1797 | 103.5442 | -2007.00 | 4390.99 |
| 418 | 3.7153 | 4 | 13.7069 | 43.26 | -130.89 | 31.1995 | 103.5242 | -1761.62 | 3730.45 |
| 419 | 3.7451 | 4 | 16.4483 | 43.26 | -130.90 | 31.2194 | 103.5042 | -1531.39 | 3074.99 |
| 420 | 3.8101 | 4 | 19.1896 | 43.26 | -130.89 | 31.2394 | 103.4844 | -1298.20 | 2453.94 |
| 421 | 3.7072 | 4 | 2.7414  | 43.26 | -130.86 | 31.0985 | 103.5748 | -2841.94 | 5864.97 |
| 422 | 3.7061 | 4 | 5.4828  | 43.26 | -130.87 | 31.1183 | 103.5548 | -2515.21 | 5514.85 |
| 423 | 3.7050 | 4 | 8.2241  | 43.26 | -130.88 | 31.1381 | 103.5348 | -2145.27 | 4993.11 |
| 424 | 3.7039 | 4 | 10.9655 | 43.26 | -130.89 | 31.1579 | 103.5147 | -1819.75 | 4401.28 |
| 425 | 3.7027 | 4 | 13.7069 | 43.26 | -130.90 | 31.1777 | 103.4947 | -1552.79 | 3760.75 |
| 426 | 3.7016 | 4 | 16.4483 | 43.26 | -130.91 | 31.1975 | 103.4746 | -1330.97 | 3108.54 |
| 427 | 3.7007 | 4 | 19.1896 | 43.26 | -130.92 | 31.2173 | 103.4546 | -1129.13 | 2482.70 |
| 428 | 3.7069 | 4 | 2.7414  | 43.26 | -130.84 | 31.0767 | 103.5454 | -2684.07 | 5448.26 |



|     |        |   |         |       |         |         |          |          |         |
|-----|--------|---|---------|-------|---------|---------|----------|----------|---------|
| 429 | 3.7055 | 4 | 5.4828  | 43.26 | -130.85 | 31.0965 | 103.5254 | -2348.64 | 5210.22 |
| 430 | 3.7041 | 4 | 8.2241  | 43.26 | -130.86 | 31.1163 | 103.5054 | -1939.87 | 4814.56 |
| 431 | 3.7026 | 4 | 10.9655 | 43.26 | -130.87 | 31.1361 | 103.4853 | -1587.98 | 4326.87 |
| 432 | 3.7012 | 4 | 13.7069 | 43.26 | -130.88 | 31.1559 | 103.4653 | -1327.02 | 3763.83 |
| 433 | 3.6998 | 4 | 16.4483 | 43.26 | -130.89 | 31.1757 | 103.4453 | -1136.29 | 3152.06 |
| 434 | 3.6983 | 4 | 19.1896 | 43.26 | -130.90 | 31.1955 | 103.4252 | -976.18  | 2537.38 |
| 435 | 3.7074 | 4 | 2.7414  | 43.26 | -130.83 | 31.0549 | 103.5160 | -2421.59 | 4900.14 |
| 436 | 3.7061 | 4 | 5.4828  | 43.26 | -130.84 | 31.0747 | 103.4960 | -2094.99 | 4760.89 |
| 437 | 3.7047 | 4 | 8.2241  | 43.26 | -130.85 | 31.0945 | 103.4760 | -1692.24 | 4516.16 |
| 438 | 3.7034 | 4 | 10.9655 | 43.26 | -130.86 | 31.1143 | 103.4559 | -1355.86 | 4183.00 |
| 439 | 3.7020 | 4 | 13.7069 | 43.26 | -130.87 | 31.1341 | 103.4359 | -1129.78 | 3738.16 |
| 440 | 3.7007 | 4 | 16.4483 | 43.26 | -130.89 | 31.1539 | 103.4159 | -981.73  | 3188.30 |
| 441 | 3.6993 | 4 | 19.1896 | 43.26 | -130.90 | 31.1737 | 103.3958 | -859.57  | 2591.22 |
| 442 | 3.7086 | 4 | 2.7414  | 43.26 | -130.82 | 31.0331 | 103.4865 | -2118.41 | 4285.99 |
| 443 | 3.7075 | 4 | 5.4828  | 43.26 | -130.83 | 31.0529 | 103.4665 | -1824.40 | 4235.36 |
| 444 | 3.7064 | 4 | 8.2241  | 43.26 | -130.84 | 31.0727 | 103.4465 | -1465.18 | 4147.55 |
| 445 | 3.7053 | 4 | 10.9655 | 43.26 | -130.85 | 31.0925 | 103.4265 | -1180.67 | 3988.46 |
| 446 | 3.7042 | 4 | 13.7069 | 43.26 | -130.86 | 31.1123 | 103.4065 | -1007.23 | 3674.47 |
| 447 | 3.7031 | 4 | 16.4483 | 43.26 | -130.87 | 31.1321 | 103.3865 | -897.26  | 3191.71 |
| 448 | 3.7020 | 4 | 19.1896 | 43.26 | -130.88 | 31.1519 | 103.3664 | -794.30  | 2617.00 |
| 449 | 3.7084 | 4 | 2.7414  | 43.26 | -130.82 | 31.0113 | 103.4571 | -1841.02 | 3671.79 |
| 450 | 3.7075 | 4 | 5.4828  | 43.26 | -130.83 | 31.0311 | 103.4371 | -1603.19 | 3686.49 |
| 451 | 3.7067 | 4 | 8.2241  | 43.26 | -130.84 | 31.0509 | 103.4171 | -1311.92 | 3743.79 |
| 452 | 3.7058 | 4 | 10.9655 | 43.26 | -130.85 | 31.0707 | 103.3971 | -1098.74 | 3751.69 |
| 453 | 3.7050 | 4 | 13.7069 | 43.26 | -130.86 | 31.0905 | 103.3771 | -978.89  | 3555.09 |
| 454 | 3.7041 | 4 | 16.4483 | 43.26 | -130.87 | 31.1103 | 103.3571 | -888.89  | 3132.75 |
| 455 | 3.7032 | 4 | 19.1896 | 43.26 | -130.88 | 31.1301 | 103.3370 | -779.41  | 2588.59 |
| 456 | 3.7089 | 4 | 2.7414  | 43.26 | -130.81 | 30.9895 | 103.4277 | -1634.40 | 3105.11 |
| 457 | 3.7078 | 4 | 5.4828  | 43.26 | -130.82 | 31.0093 | 103.4077 | -1489.13 | 3148.60 |
| 458 | 3.7067 | 4 | 8.2241  | 43.26 | -130.83 | 31.0291 | 103.3877 | -1280.71 | 3318.46 |
| 459 | 3.7056 | 4 | 10.9655 | 43.26 | -130.84 | 31.0489 | 103.3677 | -1133.01 | 3465.02 |
| 460 | 3.7045 | 4 | 13.7069 | 43.26 | -130.86 | 31.0687 | 103.3477 | -1042.37 | 3356.61 |
| 461 | 3.7034 | 4 | 16.4483 | 43.26 | -130.87 | 31.0885 | 103.3277 | -941.84  | 2986.46 |
| 462 | 3.7023 | 4 | 19.1896 | 43.26 | -130.88 | 31.1084 | 103.3076 | -800.04  | 2488.30 |
| 463 | 3.7094 | 4 | 2.7414  | 43.26 | -130.81 | 30.9677 | 103.3982 | -1492.15 | 2623.58 |
| 464 | 3.7086 | 4 | 5.4828  | 43.26 | -130.82 | 30.9875 | 103.3782 | -1485.17 | 2648.89 |
| 465 | 3.7078 | 4 | 8.2241  | 43.26 | -130.83 | 31.0073 | 103.3583 | -1370.44 | 2870.37 |
| 466 | 3.7070 | 4 | 10.9655 | 43.26 | -130.84 | 31.0271 | 103.3383 | -1264.73 | 3107.05 |
| 467 | 3.7063 | 4 | 13.7069 | 43.26 | -130.85 | 31.0469 | 103.3183 | -1165.39 | 3057.42 |
| 468 | 3.7055 | 4 | 16.4483 | 43.26 | -130.86 | 31.0668 | 103.2983 | -1024.66 | 2741.43 |
| 469 | 3.7047 | 4 | 19.1896 | 43.26 | -130.87 | 31.0866 | 103.2782 | -834.07  | 2313.64 |
| 470 | 3.7106 | 4 | 2.7414  | 43.26 | -130.81 | 30.9459 | 103.3688 | -1358.42 | 2253.09 |
| 471 | 3.7095 | 4 | 5.4828  | 43.26 | -130.82 | 30.9657 | 103.3488 | -1457.16 | 2227.95 |

|     |        |   |         |       |         |         |          |          |         |
|-----|--------|---|---------|-------|---------|---------|----------|----------|---------|
| 472 | 3.7084 | 4 | 8.2241  | 43.26 | -130.83 | 30.9855 | 103.3288 | -1445.83 | 2432.02 |
| 473 | 3.7073 | 4 | 10.9655 | 43.26 | -130.84 | 31.0053 | 103.3089 | -1384.57 | 2688.88 |
| 474 | 3.7062 | 4 | 13.7069 | 43.26 | -130.86 | 31.0251 | 103.2889 | -1270.26 | 2669.90 |
| 475 | 3.7051 | 4 | 16.4483 | 43.26 | -130.87 | 31.0450 | 103.2689 | -1089.43 | 2415.41 |
| 476 | 3.7040 | 4 | 19.1896 | 43.26 | -130.88 | 31.0648 | 103.2488 | -856.95  | 2082.69 |
| 477 | 3.7103 | 4 | 2.7414  | 43.26 | -130.79 | 30.9241 | 103.3394 | -1214.59 | 1971.10 |
| 478 | 3.7089 | 4 | 5.4828  | 43.26 | -130.80 | 30.9439 | 103.3194 | -1325.28 | 1908.31 |
| 479 | 3.7075 | 4 | 8.2241  | 43.26 | -130.82 | 30.9637 | 103.2994 | -1364.43 | 2087.44 |
| 480 | 3.7060 | 4 | 10.9655 | 43.26 | -130.83 | 30.9835 | 103.2795 | -1362.38 | 2291.80 |
| 481 | 3.7046 | 4 | 13.7069 | 43.26 | -130.84 | 31.0034 | 103.2595 | -1270.27 | 2264.98 |
| 482 | 3.7032 | 4 | 16.4483 | 43.26 | -130.85 | 31.0232 | 103.2395 | -1088.16 | 2064.98 |
| 483 | 3.7017 | 4 | 19.1896 | 43.26 | -130.86 | 31.0430 | 103.2195 | -848.87  | 1835.23 |
| 484 | 3.7108 | 4 | 2.7414  | 43.26 | -130.79 | 30.9023 | 103.3099 | -1097.97 | 1703.31 |
| 485 | 3.7097 | 4 | 5.4828  | 43.26 | -130.80 | 30.9221 | 103.2900 | -1096.68 | 1665.58 |
| 486 | 3.7085 | 4 | 8.2241  | 43.26 | -130.81 | 30.9419 | 103.2700 | -1131.81 | 1875.75 |
| 487 | 3.7073 | 4 | 10.9655 | 43.26 | -130.82 | 30.9617 | 103.2500 | -1181.20 | 2005.82 |
| 488 | 3.7060 | 4 | 13.7069 | 43.26 | -130.83 | 30.9816 | 103.2301 | -1142.70 | 1938.14 |
| 489 | 3.7047 | 4 | 16.4483 | 43.26 | -130.84 | 31.0014 | 103.2101 | -1006.11 | 1770.66 |
| 490 | 3.7032 | 4 | 19.1896 | 43.26 | -130.85 | 31.0212 | 103.1901 | -808.33  | 1626.01 |
| 491 | 3.7113 | 4 | 2.7414  | 43.26 | -130.78 | 30.8805 | 103.2805 | -916.92  | 1508.46 |
| 492 | 3.7105 | 4 | 5.4828  | 43.26 | -130.79 | 30.9003 | 103.2605 | -856.30  | 1628.41 |
| 493 | 3.7097 | 4 | 8.2241  | 43.26 | -130.80 | 30.9201 | 103.2406 | -911.07  | 1796.81 |
| 494 | 3.7089 | 4 | 10.9655 | 43.26 | -130.80 | 30.9400 | 103.2206 | -969.98  | 1842.00 |
| 495 | 3.7079 | 4 | 13.7069 | 43.26 | -130.81 | 30.9598 | 103.2007 | -966.24  | 1747.66 |
| 496 | 3.7069 | 4 | 16.4483 | 43.26 | -130.82 | 30.9796 | 103.1807 | -890.61  | 1610.08 |
| 497 | 3.7059 | 4 | 19.1896 | 43.26 | -130.83 | 30.9994 | 103.1607 | -771.13  | 1514.30 |
| 498 | 3.8829 | 4 | 1.8614  | 27.73 | -136.29 | 31.5229 | 104.1849 | -1111.82 | 2491.06 |
| 499 | 3.8819 | 4 | 3.7228  | 27.73 | -136.30 | 31.5449 | 104.1579 | -941.57  | 2239.43 |
| 500 | 3.8811 | 4 | 5.5841  | 27.73 | -136.31 | 31.5669 | 104.1309 | -812.54  | 2008.00 |
| 501 | 3.8803 | 4 | 7.4455  | 27.73 | -136.32 | 31.5889 | 104.1039 | -729.56  | 1842.92 |
| 502 | 3.8797 | 4 | 9.3069  | 27.73 | -136.33 | 31.6109 | 104.0768 | -688.35  | 1752.26 |
| 503 | 3.8819 | 4 | 1.8614  | 27.73 | -136.28 | 31.4977 | 104.1566 | -995.30  | 2359.00 |
| 504 | 3.8805 | 4 | 3.7228  | 27.73 | -136.29 | 31.5197 | 104.1296 | -876.17  | 2154.16 |
| 505 | 3.8793 | 4 | 5.5841  | 27.73 | -136.31 | 31.5417 | 104.1026 | -777.79  | 1941.36 |
| 506 | 3.8781 | 4 | 7.4455  | 27.73 | -136.32 | 31.5637 | 104.0756 | -713.58  | 1784.01 |
| 507 | 3.8770 | 4 | 9.3069  | 27.73 | -136.34 | 31.5856 | 104.0486 | -686.80  | 1707.30 |
| 508 | 3.8839 | 4 | 1.8614  | 27.73 | -136.27 | 31.4724 | 104.1284 | -888.11  | 2265.69 |
| 509 | 3.8825 | 4 | 3.7228  | 27.73 | -136.29 | 31.4944 | 104.1014 | -818.50  | 2082.80 |
| 510 | 3.8811 | 4 | 5.5841  | 27.73 | -136.30 | 31.5164 | 104.0744 | -759.99  | 1885.66 |
| 511 | 3.8797 | 4 | 7.4455  | 27.73 | -136.32 | 31.5384 | 104.0474 | -721.89  | 1737.28 |
| 512 | 3.8783 | 4 | 9.3069  | 27.73 | -136.33 | 31.5604 | 104.0203 | -708.25  | 1668.36 |
| 513 | 3.8829 | 4 | 1.8614  | 27.73 | -136.26 | 31.4472 | 104.1001 | -822.86  | 2191.51 |
| 514 | 3.8815 | 4 | 3.7228  | 27.73 | -136.28 | 31.4692 | 104.0731 | -788.27  | 2021.82 |

|     |        |   |        |       |         |         |          |         |         |
|-----|--------|---|--------|-------|---------|---------|----------|---------|---------|
| 515 | 3.8801 | 4 | 5.5841 | 27.73 | -136.29 | 31.4912 | 104.0461 | -761.98 | 1837.87 |
| 516 | 3.8788 | 4 | 7.4455 | 27.73 | -136.31 | 31.5132 | 104.0191 | -748.10 | 1699.69 |
| 517 | 3.8774 | 4 | 9.3069 | 27.73 | -136.32 | 31.5352 | 103.9921 | -744.72 | 1634.81 |
| 518 | 3.8849 | 4 | 1.8614 | 27.73 | -136.26 | 31.4220 | 104.0718 | -785.29 | 2095.79 |
| 519 | 3.8835 | 4 | 3.7228 | 27.73 | -136.27 | 31.4440 | 104.0448 | -776.17 | 1947.40 |
| 520 | 3.8821 | 4 | 5.5841 | 27.73 | -136.29 | 31.4660 | 104.0178 | -774.16 | 1785.00 |
| 521 | 3.8807 | 4 | 7.4455 | 27.73 | -136.30 | 31.4880 | 103.9909 | -776.89 | 1661.15 |
| 522 | 3.8793 | 4 | 9.3069 | 27.73 | -136.31 | 31.5100 | 103.9638 | -777.76 | 1599.56 |
| 523 | 3.8839 | 4 | 1.8614 | 27.73 | -136.25 | 31.3967 | 104.0435 | -728.17 | 1975.93 |
| 524 | 3.8825 | 4 | 3.7228 | 27.73 | -136.26 | 31.4188 | 104.0166 | -759.19 | 1856.68 |
| 525 | 3.8812 | 4 | 5.5841 | 27.73 | -136.28 | 31.4408 | 103.9896 | -785.41 | 1721.70 |
| 526 | 3.8800 | 4 | 7.4455 | 27.73 | -136.29 | 31.4628 | 103.9626 | -800.41 | 1612.15 |
| 527 | 3.8788 | 4 | 9.3069 | 27.73 | -136.31 | 31.4848 | 103.9356 | -798.00 | 1553.80 |
| 528 | 3.8859 | 4 | 1.8614 | 27.73 | -136.24 | 31.3715 | 104.0152 | -628.41 | 1874.96 |
| 529 | 3.9093 | 4 | 3.7228 | 27.73 | -136.26 | 31.3934 | 103.9882 | -732.36 | 1768.90 |
| 530 | 3.9327 | 4 | 5.5841 | 27.73 | -136.28 | 31.4154 | 103.9611 | -789.48 | 1655.34 |
| 531 | 3.9559 | 4 | 7.4455 | 27.73 | -136.29 | 31.4373 | 103.9341 | -810.90 | 1551.48 |
| 532 | 3.9791 | 4 | 9.3069 | 27.73 | -136.31 | 31.4592 | 103.9070 | -795.76 | 1493.05 |
| 533 | 3.8733 | 4 | 1.8614 | 27.73 | -137.04 | 31.3458 | 103.9868 | -669.05 | 1757.55 |
| 534 | 3.8970 | 4 | 3.7228 | 27.73 | -137.05 | 31.3676 | 103.9596 | -724.59 | 1690.30 |
| 535 | 3.9207 | 4 | 5.5841 | 27.73 | -137.06 | 31.3894 | 103.9324 | -776.59 | 1593.78 |
| 536 | 3.9443 | 4 | 7.4455 | 27.73 | -137.07 | 31.4111 | 103.9052 | -785.10 | 1481.93 |
| 537 | 3.9678 | 4 | 9.3069 | 27.73 | -137.08 | 31.4329 | 103.8779 | -751.83 | 1421.88 |
| 538 | 3.8732 | 4 | 1.8614 | 27.73 | -137.04 | 31.3203 | 103.9591 | -661.12 | 1688.74 |
| 539 | 3.8718 | 4 | 3.7228 | 27.73 | -137.05 | 31.3420 | 103.9318 | -687.61 | 1640.77 |
| 540 | 3.8705 | 4 | 5.5841 | 27.73 | -137.07 | 31.3637 | 103.9045 | -719.28 | 1545.70 |
| 541 | 3.8693 | 4 | 7.4455 | 27.73 | -137.08 | 31.3854 | 103.8772 | -708.00 | 1415.44 |
| 542 | 3.8681 | 4 | 9.3069 | 27.73 | -137.10 | 31.4071 | 103.8498 | -668.70 | 1358.73 |
| 543 | 3.8743 | 4 | 1.8614 | 27.73 | -137.02 | 31.2949 | 103.9313 | -641.46 | 1664.19 |
| 544 | 3.8733 | 4 | 3.7228 | 27.73 | -137.04 | 31.3165 | 103.9040 | -631.61 | 1618.09 |
| 545 | 3.8723 | 4 | 5.5841 | 27.73 | -137.05 | 31.3382 | 103.8767 | -627.59 | 1519.57 |
| 546 | 3.8712 | 4 | 7.4455 | 27.73 | -137.06 | 31.3599 | 103.8494 | -601.33 | 1377.49 |
| 547 | 3.8702 | 4 | 9.3069 | 27.73 | -137.08 | 31.3816 | 103.8221 | -575.92 | 1327.93 |
| 548 | 3.8750 | 4 | 1.8614 | 27.73 | -137.04 | 31.2694 | 103.9035 | -637.66 | 1679.90 |
| 549 | 3.8736 | 4 | 3.7228 | 27.73 | -137.05 | 31.2910 | 103.8762 | -600.81 | 1622.13 |
| 550 | 3.8722 | 4 | 5.5841 | 27.73 | -137.06 | 31.3127 | 103.8490 | -566.66 | 1521.56 |
| 551 | 3.8708 | 4 | 7.4455 | 27.73 | -137.08 | 31.3344 | 103.8217 | -531.48 | 1386.96 |
| 552 | 3.8695 | 4 | 9.3069 | 27.73 | -137.09 | 31.3561 | 103.7944 | -524.69 | 1345.07 |
| 553 | 3.8753 | 4 | 1.8614 | 27.73 | -137.01 | 31.2439 | 103.8757 | -671.96 | 1744.40 |
| 554 | 3.8736 | 4 | 3.7228 | 27.73 | -137.02 | 31.2656 | 103.8485 | -632.75 | 1670.17 |
| 555 | 3.8718 | 4 | 5.5841 | 27.73 | -137.03 | 31.2873 | 103.8212 | -605.71 | 1564.57 |
| 556 | 3.8706 | 4 | 7.4455 | 27.73 | -127.35 | 31.3090 | 103.7939 | -573.35 | 1442.61 |
| 557 | 3.8730 | 4 | 9.3069 | 27.73 | -127.46 | 31.3306 | 103.7666 | -558.12 | 1402.72 |

|     |        |   |         |       |         |         |          |          |         |
|-----|--------|---|---------|-------|---------|---------|----------|----------|---------|
| 558 | 3.8751 | 4 | 1.8614  | 27.73 | -137.01 | 31.2184 | 103.8480 | -740.63  | 1841.56 |
| 559 | 3.8737 | 4 | 3.7228  | 27.73 | -137.02 | 31.2401 | 103.8207 | -709.88  | 1766.02 |
| 560 | 3.9343 | 4 | 5.5841  | 27.73 | -137.05 | 31.2616 | 103.7932 | -708.52  | 1656.23 |
| 561 | 2.6902 | 4 | 7.4455  | 27.73 | -127.35 | 31.2925 | 103.7735 | -689.07  | 1524.37 |
| 562 | 2.3688 | 4 | 9.3069  | 27.73 | -127.46 | 31.3150 | 103.7475 | -658.50  | 1473.50 |
| 563 | 3.8762 | 4 | 1.8614  | 27.73 | -136.99 | 31.1929 | 103.8202 | -840.40  | 1957.88 |
| 564 | 3.2525 | 4 | 3.7228  | 27.73 | -139.01 | 31.2155 | 103.7948 | -801.13  | 1880.44 |
| 565 | 2.5731 | 4 | 5.5841  | 27.73 | -142.67 | 31.2370 | 103.7686 | -802.69  | 1764.31 |
| 566 | 2.6905 | 4 | 7.4455  | 27.73 | -127.34 | 31.2778 | 103.7510 | -801.81  | 1607.15 |
| 567 | 2.3690 | 4 | 9.3069  | 27.73 | -127.46 | 31.3021 | 103.7277 | -762.80  | 1547.88 |
| 568 | 3.5392 | 4 | 1.8614  | 27.73 | -116.34 | 31.1799 | 103.8003 | -956.05  | 2037.86 |
| 569 | 2.9154 | 4 | 3.7228  | 27.73 | -114.11 | 31.2073 | 103.7825 | -915.24  | 1977.11 |
| 570 | 2.2436 | 4 | 5.5841  | 27.73 | -109.95 | 31.2350 | 103.7662 | -905.44  | 1858.66 |
| 571 | 2.6908 | 4 | 7.4455  | 27.73 | -127.34 | 31.2631 | 103.7285 | -884.33  | 1694.73 |
| 572 | 2.3692 | 4 | 9.3069  | 27.73 | -127.07 | 31.2891 | 103.7079 | -846.32  | 1629.59 |
| 573 | 3.5391 | 4 | 1.8614  | 27.73 | -116.32 | 31.1658 | 103.7670 | -1026.25 | 2131.68 |
| 574 | 3.5378 | 4 | 3.7228  | 27.73 | -116.33 | 31.1943 | 103.7505 | -974.28  | 2080.89 |
| 575 | 3.6056 | 4 | 5.5841  | 27.73 | -116.31 | 31.2230 | 103.7343 | -950.38  | 1965.20 |
| 576 | 2.6910 | 4 | 7.4455  | 27.73 | -116.16 | 31.2485 | 103.7060 | -919.99  | 1793.80 |
| 577 | 2.5409 | 4 | 9.3069  | 27.73 | -115.19 | 31.2759 | 103.6876 | -897.56  | 1717.69 |
| 578 | 3.5400 | 4 | 1.8614  | 27.73 | -116.33 | 31.1517 | 103.7337 | -1043.69 | 2190.75 |
| 579 | 3.5396 | 4 | 3.7228  | 27.73 | -116.34 | 31.1802 | 103.7172 | -994.76  | 2134.62 |
| 580 | 3.5392 | 4 | 5.5841  | 27.73 | -116.34 | 31.2087 | 103.7007 | -955.81  | 2024.63 |
| 581 | 3.5393 | 4 | 7.4455  | 27.73 | -116.35 | 31.2373 | 103.6841 | -932.00  | 1882.41 |
| 582 | 3.5444 | 4 | 9.3069  | 27.73 | -116.36 | 31.2658 | 103.6676 | -926.80  | 1795.24 |
| 583 | 5.9773 | 4 | 19.1896 | 0.00  | -126.24 | 31.2968 | 103.5020 | -1101.20 | 1637.32 |
| 584 | 6.2558 | 4 | 19.1896 | 0.00  | -126.36 | 31.3250 | 103.4759 | -897.38  | 1186.33 |
| 585 | 6.4078 | 4 | 19.1896 | 0.00  | -126.43 | 31.3535 | 103.4502 | -693.72  | 801.80  |
| 586 | 6.5553 | 4 | 19.1896 | 0.00  | -126.48 | 31.3820 | 103.4246 | -504.67  | 529.62  |
| 587 | 6.6988 | 4 | 19.1896 | 0.00  | -126.54 | 31.4105 | 103.3989 | -345.85  | 376.42  |
| 588 | 6.8386 | 4 | 19.1896 | 0.00  | -126.59 | 31.4390 | 103.3732 | -230.78  | 316.80  |
| 589 | 6.9751 | 4 | 19.1896 | 0.00  | -126.64 | 31.4675 | 103.3474 | -166.82  | 309.59  |
| 590 | 3.8098 | 4 | 19.1896 | 0.00  | -130.90 | 31.2666 | 103.4569 | -1039.10 | 1787.31 |
| 591 | 4.0898 | 4 | 19.1896 | 0.00  | -130.76 | 31.2946 | 103.4305 | -829.08  | 1252.93 |
| 592 | 4.2481 | 4 | 19.1896 | 0.00  | -130.70 | 31.3223 | 103.4037 | -637.49  | 832.79  |
| 593 | 4.4046 | 4 | 19.1896 | 0.00  | -130.64 | 31.3500 | 103.3768 | -462.14  | 544.03  |
| 594 | 4.5596 | 4 | 19.1896 | 0.00  | -130.59 | 31.3777 | 103.3500 | -312.52  | 384.98  |
| 595 | 4.7131 | 4 | 19.1896 | 0.00  | -130.55 | 31.4054 | 103.3231 | -201.61  | 326.03  |
| 596 | 4.8653 | 4 | 19.1896 | 0.00  | -130.51 | 31.4331 | 103.2962 | -139.78  | 322.16  |
| 597 | 3.6997 | 4 | 19.1896 | 0.00  | -130.91 | 31.2445 | 103.4270 | -913.40  | 1876.80 |
| 598 | 3.6993 | 4 | 19.1896 | 0.00  | -130.94 | 31.2716 | 103.3995 | -727.54  | 1339.79 |
| 599 | 3.7041 | 4 | 19.1896 | 0.00  | -130.95 | 31.2988 | 103.3719 | -559.43  | 907.12  |
| 600 | 3.7116 | 4 | 19.1896 | 0.00  | -130.97 | 31.3260 | 103.3443 | -404.67  | 603.84  |

|     |        |   |         |      |         |         |          |         |         |
|-----|--------|---|---------|------|---------|---------|----------|---------|---------|
| 601 | 3.7215 | 4 | 19.1896 | 0.00 | -130.98 | 31.3532 | 103.3167 | -269.51 | 429.98  |
| 602 | 3.7337 | 4 | 19.1896 | 0.00 | -131.00 | 31.3804 | 103.2892 | -166.06 | 357.78  |
| 603 | 3.7479 | 4 | 19.1896 | 0.00 | -131.01 | 31.4076 | 103.2616 | -106.17 | 344.14  |
| 604 | 3.6981 | 4 | 19.1896 | 0.00 | -130.91 | 31.2227 | 103.3977 | -783.39 | 1959.64 |
| 605 | 3.6957 | 4 | 19.1896 | 0.00 | -130.93 | 31.2499 | 103.3701 | -622.33 | 1432.05 |
| 606 | 3.6939 | 4 | 19.1896 | 0.00 | -130.94 | 31.2770 | 103.3425 | -477.11 | 993.27  |
| 607 | 3.6921 | 4 | 19.1896 | 0.00 | -130.96 | 31.3042 | 103.3149 | -340.46 | 674.72  |
| 608 | 3.6904 | 4 | 19.1896 | 0.00 | -130.97 | 31.3313 | 103.2873 | -217.26 | 482.43  |
| 609 | 3.6886 | 4 | 19.1896 | 0.00 | -130.99 | 31.3585 | 103.2597 | -120.21 | 393.77  |
| 610 | 3.6868 | 4 | 19.1896 | 0.00 | -131.00 | 31.3856 | 103.2320 | -63.33  | 369.72  |
| 611 | 3.6985 | 4 | 19.1896 | 0.00 | -130.91 | 31.2009 | 103.3683 | -681.42 | 2036.84 |
| 612 | 3.6957 | 4 | 19.1896 | 0.00 | -130.92 | 31.2281 | 103.3407 | -536.49 | 1521.88 |
| 613 | 3.6939 | 4 | 19.1896 | 0.00 | -130.93 | 31.2553 | 103.3132 | -404.75 | 1079.66 |
| 614 | 3.6920 | 4 | 19.1896 | 0.00 | -130.95 | 31.2824 | 103.2856 | -277.70 | 746.51  |
| 615 | 3.6902 | 4 | 19.1896 | 0.00 | -130.96 | 31.3096 | 103.2580 | -160.80 | 535.73  |
| 616 | 3.6883 | 4 | 19.1896 | 0.00 | -130.98 | 31.3368 | 103.2304 | -68.02  | 430.91  |
| 617 | 3.6865 | 4 | 19.1896 | 0.00 | -130.99 | 31.3639 | 103.2027 | -14.68  | 397.58  |
| 618 | 3.7019 | 4 | 19.1896 | 0.00 | -130.88 | 31.1791 | 103.3389 | -622.33 | 2091.99 |
| 619 | 3.6991 | 4 | 19.1896 | 0.00 | -130.91 | 31.2063 | 103.3114 | -479.84 | 1593.79 |
| 620 | 3.6974 | 4 | 19.1896 | 0.00 | -130.92 | 31.2335 | 103.2838 | -347.61 | 1152.21 |
| 621 | 3.6958 | 4 | 19.1896 | 0.00 | -130.94 | 31.2607 | 103.2563 | -219.47 | 809.02  |
| 622 | 3.6941 | 4 | 19.1896 | 0.00 | -130.95 | 31.2878 | 103.2287 | -102.99 | 584.61  |
| 623 | 3.6924 | 4 | 19.1896 | 0.00 | -130.97 | 31.3150 | 103.2011 | -12.96  | 467.99  |
| 624 | 3.6907 | 4 | 19.1896 | 0.00 | -130.98 | 31.3422 | 103.1734 | 35.91   | 428.40  |
| 625 | 3.7024 | 4 | 19.1896 | 0.00 | -130.88 | 31.1573 | 103.3095 | -602.55 | 2104.59 |
| 626 | 3.7005 | 4 | 19.1896 | 0.00 | -130.90 | 31.1845 | 103.2820 | -447.55 | 1630.66 |
| 627 | 3.6993 | 4 | 19.1896 | 0.00 | -130.92 | 31.2117 | 103.2545 | -301.82 | 1198.15 |
| 628 | 3.6981 | 4 | 19.1896 | 0.00 | -130.93 | 31.2389 | 103.2269 | -164.62 | 854.73  |
| 629 | 3.6970 | 4 | 19.1896 | 0.00 | -130.94 | 31.2661 | 103.1993 | -45.66  | 626.25  |
| 630 | 3.6958 | 4 | 19.1896 | 0.00 | -130.96 | 31.2932 | 103.1717 | 41.24   | 505.32  |
| 631 | 3.6946 | 4 | 19.1896 | 0.00 | -130.97 | 31.3204 | 103.1441 | 84.16   | 463.51  |
| 632 | 3.7022 | 4 | 19.1896 | 0.00 | -130.88 | 31.1356 | 103.2801 | -607.20 | 2059.23 |
| 633 | 3.7001 | 4 | 19.1896 | 0.00 | -130.90 | 31.1627 | 103.2526 | -428.19 | 1620.78 |
| 634 | 3.6985 | 4 | 19.1896 | 0.00 | -130.92 | 31.1899 | 103.2251 | -261.48 | 1210.67 |
| 635 | 3.6969 | 4 | 19.1896 | 0.00 | -130.93 | 31.2171 | 103.1975 | -112.86 | 881.31  |
| 636 | 3.6953 | 4 | 19.1896 | 0.00 | -130.95 | 31.2443 | 103.1700 | 7.49    | 661.03  |
| 637 | 3.6938 | 4 | 19.1896 | 0.00 | -130.96 | 31.2714 | 103.1424 | 89.23   | 544.12  |
| 638 | 3.6922 | 4 | 19.1896 | 0.00 | -130.98 | 31.2986 | 103.1148 | 124.95  | 503.68  |
| 639 | 3.7048 | 4 | 19.1896 | 0.00 | -130.87 | 31.1138 | 103.2508 | -619.60 | 1952.90 |
| 640 | 3.7037 | 4 | 19.1896 | 0.00 | -130.89 | 31.1410 | 103.2232 | -413.37 | 1562.89 |
| 641 | 3.7026 | 4 | 19.1896 | 0.00 | -130.90 | 31.1681 | 103.1957 | -226.03 | 1190.99 |
| 642 | 3.7015 | 4 | 19.1896 | 0.00 | -130.92 | 31.1953 | 103.1682 | -68.93  | 891.34  |
| 643 | 3.7004 | 4 | 19.1896 | 0.00 | -130.93 | 31.2225 | 103.1406 | 49.50   | 691.18  |

|     |        |   |         |      |         |         |          |         |         |
|-----|--------|---|---------|------|---------|---------|----------|---------|---------|
| 644 | 3.6992 | 4 | 19.1896 | 0.00 | -130.94 | 31.2497 | 103.1130 | 124.20  | 585.16  |
| 645 | 3.6981 | 4 | 19.1896 | 0.00 | -130.96 | 31.2768 | 103.0854 | 152.90  | 548.30  |
| 646 | 3.7031 | 4 | 19.1896 | 0.00 | -130.89 | 31.0920 | 103.2213 | -625.32 | 1799.31 |
| 647 | 3.7013 | 4 | 19.1896 | 0.00 | -130.90 | 31.1191 | 103.1938 | -399.58 | 1468.03 |
| 648 | 3.7002 | 4 | 19.1896 | 0.00 | -130.92 | 31.1463 | 103.1663 | -199.90 | 1147.74 |
| 649 | 3.6991 | 4 | 19.1896 | 0.00 | -130.93 | 31.1735 | 103.1388 | -40.66  | 890.40  |
| 650 | 3.6979 | 4 | 19.1896 | 0.00 | -130.95 | 31.2007 | 103.1112 | 72.64   | 718.95  |
| 651 | 3.6968 | 4 | 19.1896 | 0.00 | -130.96 | 31.2279 | 103.0837 | 140.19  | 627.85  |
| 652 | 3.6957 | 4 | 19.1896 | 0.00 | -130.97 | 31.2550 | 103.0561 | 164.13  | 595.15  |
| 653 | 3.7015 | 4 | 19.1896 | 0.00 | -130.87 | 31.0702 | 103.1920 | -611.65 | 1627.36 |
| 654 | 3.6980 | 4 | 19.1896 | 0.00 | -130.89 | 31.0974 | 103.1645 | -383.26 | 1357.43 |
| 655 | 3.6957 | 4 | 19.1896 | 0.00 | -130.90 | 31.1246 | 103.1370 | -185.53 | 1094.65 |
| 656 | 3.6934 | 4 | 19.1896 | 0.00 | -130.91 | 31.1517 | 103.1095 | -32.21  | 885.13  |
| 657 | 3.6912 | 4 | 19.1896 | 0.00 | -130.93 | 31.1789 | 103.0819 | 73.75   | 745.48  |
| 658 | 3.6889 | 4 | 19.1896 | 0.00 | -130.94 | 31.2061 | 103.0544 | 135.79  | 669.97  |
| 659 | 3.6867 | 4 | 19.1896 | 0.00 | -130.96 | 31.2333 | 103.0268 | 158.57  | 640.74  |
| 660 | 3.7027 | 4 | 19.1896 | 0.00 | -130.85 | 31.0484 | 103.1626 | -569.20 | 1470.59 |
| 661 | 3.6995 | 4 | 19.1896 | 0.00 | -130.87 | 31.0756 | 103.1352 | -359.46 | 1256.64 |
| 662 | 3.6972 | 4 | 19.1896 | 0.00 | -130.88 | 31.1028 | 103.1077 | -180.22 | 1048.58 |
| 663 | 3.6947 | 4 | 19.1896 | 0.00 | -130.90 | 31.1300 | 103.0801 | -40.89  | 883.51  |
| 664 | 3.6921 | 4 | 19.1896 | 0.00 | -130.91 | 31.1572 | 103.0526 | 56.41   | 772.02  |
| 665 | 3.6893 | 4 | 19.1896 | 0.00 | -130.93 | 31.1844 | 103.0251 | 115.22  | 708.92  |
| 666 | 3.6865 | 4 | 19.1896 | 0.00 | -130.94 | 31.2115 | 102.9975 | 140.54  | 681.01  |
| 667 | 3.7053 | 4 | 19.1896 | 0.00 | -130.84 | 31.0266 | 103.1333 | -491.72 | 1344.53 |
| 668 | 3.7034 | 4 | 19.1896 | 0.00 | -130.85 | 31.0538 | 103.1058 | -332.48 | 1189.41 |
| 669 | 3.7018 | 4 | 19.1896 | 0.00 | -130.86 | 31.0811 | 103.0783 | -183.79 | 1028.59 |
| 670 | 3.7002 | 4 | 19.1896 | 0.00 | -130.87 | 31.1082 | 103.0508 | -61.68  | 895.89  |
| 671 | 3.6984 | 4 | 19.1896 | 0.00 | -130.88 | 31.1354 | 103.0233 | 28.18   | 801.45  |
| 672 | 3.6965 | 4 | 19.1896 | 0.00 | -130.89 | 31.1626 | 102.9958 | 86.69   | 742.88  |
| 673 | 3.6944 | 4 | 19.1896 | 0.00 | -130.90 | 31.1898 | 102.9682 | 118.19  | 711.64  |

\*Length: fault patch horizontal length; depth: fault lower edge depth; dip: fault dip angle; strike: fault strike direction, clockwise from north; lat & long: coordinate of fault patch lower left corner; SS & TS: strike slip and thrust slip components in mm.

Table 3. GPS data fitting.

|    | Sites | Long    | Lat    | D  | E/mm   | Prd_E/mm | Sig_E/mm | N/mm  | Prd_N/mm | Sig_N/mm | U/mm  | Prd_U/mm | Sig_U/mm* |
|----|-------|---------|--------|----|--------|----------|----------|-------|----------|----------|-------|----------|-----------|
| 1  | 1375  | 105.815 | 33.340 | 18 | 5.0    | 16.1     | 8.0      | 42.0  | 64.4     | 8.0      |       |          |           |
| 2  | 1387  | 106.233 | 32.820 | 18 | -46.0  | -54.1    | 8.1      | 12.0  | 11.0     | 8.0      |       |          |           |
| 3  | 2017  | 103.652 | 32.815 | 18 | 89.0   | 94.8     | 5.0      | -38.0 | -30.2    | 4.9      |       |          |           |
| 4  | 2020  | 104.692 | 32.359 | 18 | 686.0  | 659.7    | 7.4      | 251.0 | 378.5    | 7.2      | -80.0 | -58.2    | 15.2      |
| 5  | 2031  | 102.372 | 31.000 | 20 | 163.0  | 140.3    | 6.7      | -3.0  | -10.5    | 6.6      |       |          |           |
| 6  | 2033  | 103.090 | 30.064 | 20 | -10.0  | -8.7     | 4.4      | -7.0  | -17.6    | 4.1      |       |          |           |
| 7  | 2037  | 105.071 | 31.081 | 20 | -115.0 | -183.8   | 6.2      | 26.0  | 37.7     | 6.0      |       |          |           |
| 8  | 2049  | 103.640 | 30.624 | 20 | -118.0 | -132.1   | 6.0      | 120.0 | 105.4    | 5.8      | -57.0 | -55.1    | 13.5      |
| 9  | 2052  | 105.554 | 30.510 | 20 | -42.0  | -75.9    | 5.2      | 20.0  | 25.4     | 5.0      |       |          |           |
| 10 | BADN  | 110.350 | 31.049 | 1  | -6.0   | -13.1    | 3.0      | 3.0   | 2.9      | 2.9      | 0.0   | 2.8      | 5.2       |
| 11 | BNSL  | 106.851 | 29.303 | 1  | -10.0  | -21.3    | 4.0      | 4.0   | 10.1     | 3.7      | 0.0   | 2.8      | 13.3      |
| 12 | C125  | 104.817 | 34.381 | 21 | 1.0    | 5.8      | 8.5      | 10.0  | 23.9     | 8.5      |       |          |           |
| 13 | C127  | 105.295 | 34.027 | 20 | 1.0    | 8.2      | 8.9      | 14.0  | 39.3     | 9.0      |       |          |           |
| 14 | C140  | 104.078 | 34.365 | 21 | 11.0   | 7.9      | 8.9      | 7.0   | 11.4     | 8.7      |       |          |           |
| 15 | CHDU  | 104.064 | 30.639 | 1  | -158.0 | -179.4   | 4.9      | 117.0 | 100.9    | 4.8      | -11.0 | -22.9    | 4.8       |
| 16 | CP02  | 102.151 | 30.066 | 22 | 7.0    | 12.0     | 4.6      | 4.0   | -7.8     | 4.6      |       |          |           |
| 17 | CP11  | 102.871 | 29.291 | 26 | -8.0   | -4.8     | 4.6      | -8.0  | -10.2    | 4.6      |       |          |           |
| 18 | D066  | 108.999 | 34.974 | 5  | 3.0    | -2.5     | 5.8      | 10.0  | 2.5      | 5.7      |       |          |           |
| 19 | D071  | 108.914 | 34.552 | 8  | 3.0    | -4.0     | 6.4      | 14.0  | 2.2      | 6.4      |       |          |           |
| 20 | D072  | 108.233 | 34.496 | 5  | -3.0   | -3.3     | 5.6      | 10.0  | 3.8      | 5.6      |       |          |           |
| 21 | D073  | 107.580 | 34.433 | 8  | 6.0    | -1.8     | 8.1      | 5.0   | 6.5      | 7.5      |       |          |           |
| 22 | D074  | 107.379 | 34.472 | 8  | 1.0    | -0.8     | 5.1      | 3.0   | 7.8      | 5.1      |       |          |           |
| 23 | D077  | 108.194 | 34.302 | 6  | 0.0    | -4.3     | 5.4      | 7.0   | 3.6      | 5.4      |       |          |           |

|    |      |         |        |    |       |       |      |      |      |      |     |     |     |
|----|------|---------|--------|----|-------|-------|------|------|------|------|-----|-----|-----|
| 24 | D079 | 108.908 | 34.050 | 23 | -6.0  | -6.7  | 5.5  | -2.0 | 1.7  | 5.5  |     |     |     |
| 25 | D080 | 108.157 | 34.110 | 6  | 2.0   | -5.6  | 5.0  | 1.0  | 3.3  | 5.0  |     |     |     |
| 26 | D081 | 107.639 | 34.069 | 5  | 7.0   | -4.6  | 5.7  | 3.0  | 5.5  | 5.6  |     |     |     |
| 27 | D082 | 107.294 | 34.088 | 8  | 1.0   | -2.9  | 5.3  | 5.0  | 7.9  | 5.2  |     |     |     |
| 28 | DS08 | 104.953 | 33.460 | 20 | 5.0   | 13.7  | 9.7  | 53.0 | 74.6 | 9.7  |     |     |     |
| 29 | DS30 | 106.245 | 33.901 | 20 | 6.0   | 5.2   | 11.1 | 4.0  | 25.5 | 10.6 |     |     |     |
| 30 | F053 | 107.982 | 33.529 | 5  | -6.0  | -11.8 | 4.9  | -2.0 | 2.5  | 4.9  |     |     |     |
| 31 | F262 | 106.322 | 33.063 | 18 | -25.0 | -21.1 | 8.0  | 23.0 | 17.1 | 8.0  |     |     |     |
| 32 | F277 | 105.781 | 32.826 | 18 | -44.0 | -19.7 | 8.4  | 46.0 | 61.7 | 8.3  |     |     |     |
| 33 | FDLH | 108.015 | 29.816 | 1  | -10.0 | -21.5 | 3.6  | 6.0  | 8.6  | 3.5  | 0.0 | 4.2 | 7.5 |
| 34 | FJHT | 109.119 | 31.105 | 1  | -8.0  | -20.3 | 3.4  | 3.0  | 4.7  | 3.3  | 0.0 | 4.3 | 7.8 |
| 35 | FJXL | 109.444 | 30.667 | 1  | -7.0  | -17.1 | 3.1  | 2.0  | 4.7  | 2.9  | 0.0 | 3.7 | 5.6 |
| 36 | G028 | 106.011 | 35.174 | 12 | 5.0   | 3.3   | 4.7  | 7.0  | 13.5 | 4.7  |     |     |     |
| 37 | G030 | 105.794 | 35.079 | 12 | 1.0   | 3.7   | 4.5  | 4.0  | 15.0 | 4.5  |     |     |     |
| 38 | G031 | 106.207 | 35.006 | 11 | 1.0   | 3.4   | 4.9  | 10.0 | 14.1 | 4.9  |     |     |     |
| 39 | G032 | 106.821 | 34.894 | 8  | 2.0   | 2.2   | 4.5  | 5.0  | 11.0 | 4.5  |     |     |     |
| 40 | G033 | 105.655 | 34.872 | 14 | 4.0   | 4.2   | 5.6  | 12.0 | 17.7 | 5.5  |     |     |     |
| 41 | G034 | 106.159 | 34.749 | 11 | 11.0  | 4.0   | 5.8  | 11.0 | 16.6 | 5.7  |     |     |     |
| 42 | G035 | 105.368 | 34.793 | 14 | 2.0   | 4.5   | 4.9  | 6.0  | 19.1 | 4.9  |     |     |     |
| 43 | G036 | 106.401 | 34.516 | 11 | 0.0   | 3.7   | 5.5  | 11.0 | 16.6 | 5.5  |     |     |     |
| 44 | G037 | 105.697 | 34.594 | 11 | 5.0   | 5.1   | 5.1  | 10.0 | 21.7 | 5.1  |     |     |     |
| 45 | G039 | 105.812 | 34.252 | 27 | 3.0   | 6.5   | 5.6  | 12.0 | 27.6 | 5.6  |     |     |     |
| 46 | G110 | 106.678 | 34.946 | 9  | 3.0   | 2.6   | 4.7  | 6.0  | 11.7 | 4.7  |     |     |     |
| 47 | G114 | 104.104 | 35.038 | 14 | 3.0   | 4.6   | 4.5  | 6.0  | 8.4  | 4.5  |     |     |     |
| 48 | G119 | 104.480 | 34.850 | 14 | -1.0  | 4.5   | 4.8  | 14.0 | 13.3 | 4.8  |     |     |     |









|     |      |         |        |    |        |        |      |        |        |      |       |        |     |
|-----|------|---------|--------|----|--------|--------|------|--------|--------|------|-------|--------|-----|
| 124 | JB34 | 102.306 | 31.706 | 25 | 187.0  | 169.5  | 6.5  | -66.0  | -61.2  | 6.5  | -20.0 | 18.6   | 7.2 |
| 125 | JB35 | 101.497 | 30.495 | 12 | 30.0   | 32.4   | 6.1  | -6.0   | -2.1   | 6.1  |       |        |     |
| 126 | JB36 | 103.526 | 28.843 | 7  | -3.0   | -7.0   | 4.8  | -3.0   | -5.3   | 4.7  |       |        |     |
| 127 | JJML | 106.254 | 29.182 | 1  | -11.0  | -21.0  | 3.2  | 6.0    | 10.1   | 3.1  | 0.0   | 1.6    | 5.0 |
| 128 | JYAN | 104.545 | 30.388 | 1  | -71.0  | -96.0  | 4.2  | 42.0   | 42.8   | 4.1  | -1.0  | -5.7   | 3.8 |
| 129 | KAIY | 102.112 | 27.882 | 1  | -1.0   | -1.7   | 2.5  | -2.0   | -4.9   | 2.4  | 2.0   | -4.9   | 4.8 |
| 130 | KXLJ | 108.166 | 31.078 | 1  | -14.0  | -30.1  | 3.4  | 5.0    | 7.7    | 3.3  | 0.0   | 6.1    | 4.9 |
| 131 | LESH | 103.755 | 29.565 | 1  | -12.0  | -16.3  | 3.1  | 7.0    | -1.3   | 3.0  | -4.0  | -13.6  | 4.8 |
| 132 | LFPF | 107.863 | 30.770 | 1  | -15.0  | -31.9  | 3.4  | 4.0    | 9.7    | 3.3  | 0.0   | 6.4    | 5.5 |
| 133 | LUZH | 105.414 | 28.872 | 1  | -10.0  | -16.0  | 2.7  | 4.0    | 6.9    | 2.6  | 1.0   | -1.4   | 3.0 |
| 134 | MAON | 101.745 | 30.600 | 1  | 41.0   | 42.0   | 3.6  | 5.0    | -2.4   | 3.5  | -1.0  | -2.6   | 4.2 |
| 135 | MEIG | 103.134 | 28.335 | 1  | -3.0   | -4.0   | 2.6  | -1.0   | -5.6   | 2.5  | -3.0  | -6.7   | 4.3 |
| 136 | MYAN | 104.726 | 31.440 | 1  | -305.0 | -410.4 | 5.4  | 66.0   | 58.3   | 5.4  | -14.0 | -18.5  | 4.9 |
| 137 | NEIJ | 105.119 | 29.620 | 1  | -22.0  | -32.3  | 3.4  | 11.0   | 14.2   | 3.3  | 0.0   | -1.6   | 3.4 |
| 138 | NR09 | 103.169 | 31.448 | 21 | 738.0  | 676.8  | 8.2  | -392.0 | -400.9 | 8.2  |       |        |     |
| 139 | PIXI | 103.757 | 30.910 | 1  | -563.0 | -514.6 | 6.5  | 426.0  | 344.7  | 6.4  | -81.0 | -101.6 | 7.2 |
| 140 | QIME | 101.185 | 31.023 | 1  | 45.0   | 47.4   | 3.7  | 0.0    | -5.0   | 3.6  | 1.0   | 4.3    | 4.0 |
| 141 | QLAI | 103.306 | 30.354 | 1  | -15.0  | -20.4  | 3.2  | -3.0   | -12.9  | 3.2  | -28.0 | -43.0  | 5.9 |
| 142 | RCPL | 105.350 | 29.534 | 1  | -18.0  | -29.6  | 3.2  | 9.0    | 13.2   | 3.2  | 0.0   | -0.5   | 3.6 |
| 143 | RENS | 104.103 | 30.200 | 1  | -51.0  | -62.5  | 3.9  | 40.0   | 32.1   | 3.9  | -5.0  | -14.5  | 4.3 |
| 144 | ROXI | 104.434 | 29.458 | 1  | -17.0  | -22.7  | 3.4  | 10.0   | 7.5    | 3.3  | -6.0  | -6.9   | 8.0 |
| 145 | SD07 | 102.438 | 31.143 | 17 | 226.0  | 190.5  | 11.2 | -35.0  | -26.1  | 11.2 | 12.0  | 0.6    | 9.1 |
| 146 | TAGO | 101.526 | 30.326 | 1  | 22.0   | 25.3   | 3.3  | 3.0    | -2.3   | 3.2  | -2.0  | -3.6   | 4.2 |
| 147 | WANZ | 108.461 | 30.752 | 1  | -10.0  | -24.9  | 3.0  | 4.0    | 7.2    | 3.0  | 0.0   | 5.2    | 4.4 |
| 148 | WARI | 101.125 | 30.881 | 7  | 38.0   | 40.9   | 4.1  | 1.0    | -3.5   | 4.1  | -2.0  | 3.0    | 5.6 |

|     |      |         |        |    |         |         |     |       |       |     |        |        |      |
|-----|------|---------|--------|----|---------|---------|-----|-------|-------|-----|--------|--------|------|
| 149 | XIAA | 108.986 | 34.178 | 1  | -3.0    | -5.9    | 2.2 | 1.0   | 1.7   | 2.1 |        |        |      |
| 150 | XICH | 102.348 | 27.809 | 1  | -1.0    | -2.0    | 2.4 | -2.0  | -4.9  | 2.3 | 2.0    | -4.9   | 4.6  |
| 151 | YAAN | 103.011 | 29.981 | 1  | -4.0    | -6.9    | 2.9 | -8.0  | -16.9 | 2.9 | -16.0  | -24.0  | 5.4  |
| 152 | YBIN | 104.597 | 28.798 | 1  | -8.0    | -12.1   | 2.9 | 3.0   | 2.5   | 2.8 | -1.0   | -4.6   | 4.2  |
| 153 | Z040 | 103.677 | 32.043 | 18 | 310.0   | 370.8   | 7.2 | -34.0 | -94.5 | 7.1 |        |        |      |
| 154 | Z122 | 104.446 | 31.689 | 18 | -945.0  | -1061.6 | 9.3 | 439.0 | 302.3 | 9.1 |        |        |      |
| 155 | Z126 | 104.250 | 31.511 | 18 | -1221.0 | -1071.5 | 8.9 | 379.0 | 284.8 | 8.7 | -204.0 | -233.1 | 34.9 |
| 156 | Z158 | 105.947 | 31.845 | 18 | -100.0  | -151.8  | 7.4 | 36.0  | 32.8  | 7.0 |        |        |      |
| 157 | Z246 | 103.578 | 30.866 | 20 | -379.0  | -433.6  | 8.1 | 366.0 | 346.1 | 7.9 | -156.0 | -140.8 | 35.3 |
| 158 | ZHJI | 104.546 | 31.006 | 1  | -203.0  | -275.3  | 4.9 | 73.0  | 83.9  | 4.8 | -5.0   | -8.6   | 4.3  |

\* D is the number of days elapsed between the quake and the first postseismic GPS measurement at the site. E, Prd\_E, Sig\_E, N, Prd\_N, Sig\_N, U, Prd\_U, Sig\_U are the data entries, model predicted, and uncertainties for the east, north, and up components, respectively. Each uncertainty has been enlarged by adding  $A^{1/4}$  to its original value, where A is the amplitude of observed coseismic displacement vector in millimeter.
